# Supplementary material for: Host Defense Peptides LL-37 and Lactoferrin Trigger ET Release from Blood-Derived Circulating Monocytes
Source: MDPI journal article supplement (doi:10.3390/biomedicines10020469), 2022-02-17
Supplement: s1 [file s1]

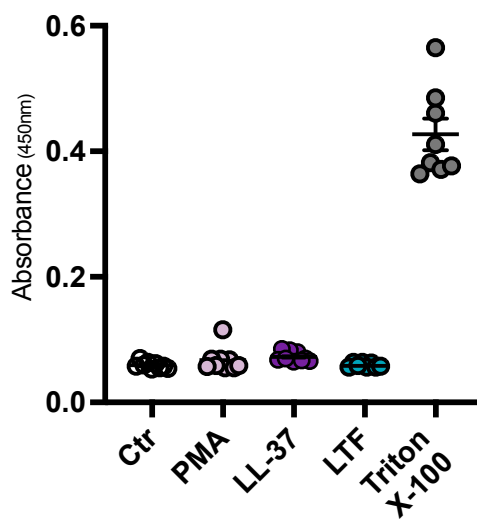

**Supplemental Figure S1.** Determination of possible cytotoxicity. Analysis of LDH release. Triton X-100 served as positive lysis control.
