# Supplementary material for: Host Defense Peptides LL-37 and Lactoferrin Trigger ET Release from Blood-Derived Circulating Monocytes
Source: Biomedicines. 2022 Feb 17;10(2):469. doi: 10.3390/biomedicines10020469 (PMC8962388; doi:10.3390/biomedicines10020469)
Supplement: Supplementary file 1 [file biomedicines-10-00469-s001.zip › biomedicines-1560369-supplementary-Tables S1 and S2.xlsx]

## Sheet: Suppl. Table S1
Accession	Description	Coverage [%]	# Peptides	# Unique Peptides	# AAs	MW [kDa]	calc. pI	LH_C2111_053, PMN_sup_1	LH_C2111_054, PMN_sup_2	LH_C2111_055, PMN_sup_3	Modifications
P35579	Myosin-9 OS=Homo sapiens OX=9606 GN=MYH9 PE=1 SV=4	37	91	86	1960	226.4	5.6	2.30036e+08	2.68182e+08	2.49122e+08
P02788	Lactotransferrin OS=Homo sapiens OX=9606 GN=LTF PE=1 SV=6	81	72	72	710	78.1	8.12	6.65818e+08	9.99998e+08	8.9287e+08
P21333	Filamin-A OS=Homo sapiens OX=9606 GN=FLNA PE=1 SV=4	47	97	97	2647	280.6	6.06	1.30017e+08	1.6846e+08	1.4815e+08
P02768	Albumin OS=Homo sapiens OX=9606 GN=ALB PE=1 SV=2	78	55	55	609	69.3	6.28	1.07185e+09	1.36595e+09	1.22908e+09
P12814	Alpha-actinin-1 OS=Homo sapiens OX=9606 GN=ACTN1 PE=1 SV=2	67	60	41	892	103	5.41	1.27163e+08	1.71136e+08	1.44097e+08	Acetyl [N-Term]
P29401	Transketolase OS=Homo sapiens OX=9606 GN=TKT PE=1 SV=3	83	53	53	623	67.8	7.66	5.38382e+08	6.66078e+08	5.68176e+08	Acetyl [N-Term]
P13796	Plastin-2 OS=Homo sapiens OX=9606 GN=LCP1 PE=1 SV=6	84	52	52	627	70.2	5.43	5.51148e+08	6.87517e+08	5.57013e+08
O43707	Alpha-actinin-4 OS=Homo sapiens OX=9606 GN=ACTN4 PE=1 SV=2	55	51	32	911	104.8	5.44	4.27102e+07	5.39379e+07	4.32534e+07
P04040	Catalase OS=Homo sapiens OX=9606 GN=CAT PE=1 SV=3	81	48	48	527	59.7	7.39	3.08986e+08	3.88384e+08	3.72834e+08
P60174	Triosephosphate isomerase OS=Homo sapiens OX=9606 GN=TPI1 PE=1 SV=4	94	38	38	249	26.7	6.9	2.26343e+08	2.99699e+08	2.65489e+08
P05164	Myeloperoxidase OS=Homo sapiens OX=9606 GN=MPO PE=1 SV=1	55	45	40	745	83.8	8.97	1.86715e+08	2.48034e+08	2.26647e+08
P14780	Matrix metalloproteinase-9 OS=Homo sapiens OX=9606 GN=MMP9 PE=1 SV=3	60	43	43	707	78.4	6.06	5.5081e+08	7.05892e+08	6.24962e+08
P30740	Leukocyte elastase inhibitor OS=Homo sapiens OX=9606 GN=SERPINB1 PE=1 SV=1	64	39	38	379	42.7	6.28	3.14047e+08	4.12184e+08	1.93154e+08	Acetyl [N-Term]
P02787	Serotransferrin OS=Homo sapiens OX=9606 GN=TF PE=1 SV=3	59	42	42	698	77	7.12	7.65193e+07	1.04132e+08	9.54158e+07
P0DMV9	Heat shock 70 kDa protein 1B OS=Homo sapiens OX=9606 GN=HSPA1B PE=1 SV=1	62	34	31	641	70	5.66	1.40031e+08	1.76656e+08	1.50289e+08
P06744	Glucose-6-phosphate isomerase OS=Homo sapiens OX=9606 GN=GPI PE=1 SV=4	61	34	34	558	63.1	8.32	2.11934e+08	2.89566e+08	2.36715e+08
P68871	Hemoglobin subunit beta OS=Homo sapiens OX=9606 GN=HBB PE=1 SV=2	97	19	12	147	16	7.28	2.74065e+09	3.54309e+09	3.3076e+09
P02675	Fibrinogen beta chain OS=Homo sapiens OX=9606 GN=FGB PE=1 SV=2	69	32	32	491	55.9	8.27	9.1054e+07	1.15624e+08	9.08413e+07
P04264	Keratin, type II cytoskeletal 1 OS=Homo sapiens OX=9606 GN=KRT1 PE=1 SV=6	57	39	34	644	66	8.12	3.6723e+07	1.36663e+08	5.93626e+07
P69905	Hemoglobin subunit alpha OS=Homo sapiens OX=9606 GN=HBA1 PE=1 SV=2	96	16	16	142	15.2	8.68	2.36909e+09	2.90545e+09	2.79791e+09
P11142	Heat shock cognate 71 kDa protein OS=Homo sapiens OX=9606 GN=HSPA8 PE=1 SV=1	54	32	28	646	70.9	5.52	7.47812e+07	9.92673e+07	7.93864e+07
P00491	Purine nucleoside phosphorylase OS=Homo sapiens OX=9606 GN=PNP PE=1 SV=2	84	22	22	289	32.1	6.95	6.89566e+07	8.95241e+07	6.83763e+07	Acetyl [N-Term]
P12429	Annexin A3 OS=Homo sapiens OX=9606 GN=ANXA3 PE=1 SV=3	73	29	29	323	36.4	5.92	3.47404e+08	4.13001e+08	3.8153e+08
P50395	Rab GDP dissociation inhibitor beta OS=Homo sapiens OX=9606 GN=GDI2 PE=1 SV=2	80	36	26	445	50.6	6.47	2.42368e+07	3.13003e+07	2.46905e+07
P15144	Aminopeptidase N OS=Homo sapiens OX=9606 GN=ANPEP PE=1 SV=4	44	47	47	967	109.5	5.48	4.60826e+07	6.03809e+07	5.27758e+07
P60709	Actin, cytoplasmic 1 OS=Homo sapiens OX=9606 GN=ACTB PE=1 SV=1	64	20	9	375	41.7	5.48	4.26556e+07	5.6881e+07	4.83569e+07
P18206	Vinculin OS=Homo sapiens OX=9606 GN=VCL PE=1 SV=4	35	39	39	1134	123.7	5.66	3.79e+07	4.55322e+07	3.55212e+07
P35908	Keratin, type II cytoskeletal 2 epidermal OS=Homo sapiens OX=9606 GN=KRT2 PE=1 SV=2	69	39	29	639	65.4	8	1.59755e+07	4.92025e+07	1.13078e+07
P01024	Complement C3 OS=Homo sapiens OX=9606 GN=C3 PE=1 SV=2	38	53	53	1663	187	6.4	1.49967e+07	1.98288e+07	1.57404e+07
P80188	Neutrophil gelatinase-associated lipocalin OS=Homo sapiens OX=9606 GN=LCN2 PE=1 SV=2	80	20	20	198	22.6	8.91	6.20192e+08	7.96567e+08	7.08188e+08
P06733	Alpha-enolase OS=Homo sapiens OX=9606 GN=ENO1 PE=1 SV=2	66	27	26	434	47.1	7.39	1.04142e+08	1.20298e+08	1.00178e+08
P00738	Haptoglobin OS=Homo sapiens OX=9606 GN=HP PE=1 SV=1	56	25	11	406	45.2	6.58	8.14279e+07	1.03606e+08	9.48774e+07
Q01518	Adenylyl cyclase-associated protein 1 OS=Homo sapiens OX=9606 GN=CAP1 PE=1 SV=5	53	26	26	475	51.9	8.06	1.12333e+08	1.39229e+08	1.19305e+08
P26038	Moesin OS=Homo sapiens OX=9606 GN=MSN PE=1 SV=3	50	34	26	577	67.8	6.4	6.62831e+07	9.62541e+07	7.47961e+07
P46940	Ras GTPase-activating-like protein IQGAP1 OS=Homo sapiens OX=9606 GN=IQGAP1 PE=1 SV=1	26	32	32	1657	189.1	6.48	1.99907e+07	2.45704e+07	2.03128e+07
P02042	Hemoglobin subunit delta OS=Homo sapiens OX=9606 GN=HBD PE=1 SV=2	96	16	9	147	16	8.05	8.71871e+07	1.10288e+08	9.46256e+07
P13645	Keratin, type I cytoskeletal 10 OS=Homo sapiens OX=9606 GN=KRT10 PE=1 SV=6	55	29	25	584	58.8	5.21	3.35618e+07	9.73827e+07	2.56607e+07
P06702	Protein S100-A9 OS=Homo sapiens OX=9606 GN=S100A9 PE=1 SV=1	94	15	15	114	13.2	6.13	7.50136e+08	9.16161e+08	1.23559e+09
P31150	Rab GDP dissociation inhibitor alpha OS=Homo sapiens OX=9606 GN=GDI1 PE=1 SV=2	65	25	15	447	50.6	5.14	1.04196e+07	1.35357e+07	1.20939e+07
P08670	Vimentin OS=Homo sapiens OX=9606 GN=VIM PE=1 SV=4	45	27	27	466	53.6	5.12	7.54783e+07	9.22913e+07	6.95147e+07
P35527	Keratin, type I cytoskeletal 9 OS=Homo sapiens OX=9606 GN=KRT9 PE=1 SV=3	68	26	25	623	62	5.24	2.18808e+07	6.58862e+07	5.24043e+07
P02679	Fibrinogen gamma chain OS=Homo sapiens OX=9606 GN=FGG PE=1 SV=3	59	21	21	453	51.5	5.62	8.46319e+07	1.12376e+08	9.77742e+07
O75955	Flotillin-1 OS=Homo sapiens OX=9606 GN=FLOT1 PE=1 SV=3	68	29	29	427	47.3	7.49	2.24488e+07	2.7186e+07	2.84376e+07
P05109	Protein S100-A8 OS=Homo sapiens OX=9606 GN=S100A8 PE=1 SV=1	60	15	15	93	10.8	7.03	5.36527e+08	6.08916e+08	9.31001e+08	Acetyl [N-Term]
P06396	Gelsolin OS=Homo sapiens OX=9606 GN=GSN PE=1 SV=1	37	23	23	782	85.6	6.28	1.08871e+08	1.34681e+08	1.06358e+08
P01009	Alpha-1-antitrypsin OS=Homo sapiens OX=9606 GN=SERPINA1 PE=1 SV=3	51	26	26	418	46.7	5.59	5.80298e+07	7.45485e+07	4.42479e+07
P04083	Annexin A1 OS=Homo sapiens OX=9606 GN=ANXA1 PE=1 SV=2	66	24	24	346	38.7	7.02	8.76985e+07	1.06508e+08	9.32077e+07
P04259	Keratin, type II cytoskeletal 6B OS=Homo sapiens OX=9606 GN=KRT6B PE=1 SV=5	52	31	3	564	60	8	53347.8	4.20488e+06	75282.1
Q6UX06	Olfactomedin-4 OS=Homo sapiens OX=9606 GN=OLFM4 PE=1 SV=1	39	16	16	510	57.2	5.69	3.75509e+07	5.24424e+07	4.42503e+07
P02538	Keratin, type II cytoskeletal 6A OS=Homo sapiens OX=9606 GN=KRT6A PE=1 SV=3	51	31	3	564	60	8	134356	4.9833e+06	240228
P04075	Fructose-bisphosphate aldolase A OS=Homo sapiens OX=9606 GN=ALDOA PE=1 SV=2	69	23	20	364	39.4	8.09	7.01347e+07	8.56588e+07	6.92568e+07
Q13231	Chitotriosidase-1 OS=Homo sapiens OX=9606 GN=CHIT1 PE=1 SV=1	60	23	23	466	51.6	6.96	2.23542e+07	2.9282e+07	2.40563e+07
P07996	Thrombospondin-1 OS=Homo sapiens OX=9606 GN=THBS1 PE=1 SV=2	32	28	28	1170	129.3	4.94	2.54587e+07	3.22808e+07	2.8996e+07
P08779	Keratin, type I cytoskeletal 16 OS=Homo sapiens OX=9606 GN=KRT16 PE=1 SV=4	59	27	15	473	51.2	5.05	120495	2.02943e+07	91352.1
P11215	Integrin alpha-M OS=Homo sapiens OX=9606 GN=ITGAM PE=1 SV=2	30	30	30	1152	127.1	7.23	2.05056e+07	2.54933e+07	2.36642e+07
P00390	Glutathione reductase, mitochondrial OS=Homo sapiens OX=9606 GN=GSR PE=1 SV=2	65	25	25	522	56.2	8.5	2.23341e+07	2.76923e+07	2.56872e+07
P37837	Transaldolase OS=Homo sapiens OX=9606 GN=TALDO1 PE=1 SV=2	59	26	26	337	37.5	6.81	7.38524e+07	9.03782e+07	8.10384e+07
P07737	Profilin-1 OS=Homo sapiens OX=9606 GN=PFN1 PE=1 SV=2	79	17	17	140	15	8.27	2.06344e+08	2.65597e+08	1.97941e+08
Q13813	Spectrin alpha chain, non-erythrocytic 1 OS=Homo sapiens OX=9606 GN=SPTAN1 PE=1 SV=3	20	38	38	2472	284.4	5.35	7.06638e+06	9.00104e+06	7.47068e+06
P00915	Carbonic anhydrase 1 OS=Homo sapiens OX=9606 GN=CA1 PE=1 SV=2	62	14	14	261	28.9	7.12	5.27704e+07	7.07874e+07	5.84026e+07
Q14254	Flotillin-2 OS=Homo sapiens OX=9606 GN=FLOT2 PE=1 SV=2	62	28	28	428	47	5.25	9.55503e+06	1.42644e+07	1.09015e+07
P02751	Fibronectin OS=Homo sapiens OX=9606 GN=FN1 PE=1 SV=5	19	31	31	2477	272.2	5.5	8.0541e+06	1.09343e+07	9052009
P36222	Chitinase-3-like protein 1 OS=Homo sapiens OX=9606 GN=CHI3L1 PE=1 SV=2	55	18	18	383	42.6	8.46	3.9327e+07	5.2193e+07	4.57659e+07
P11021	Endoplasmic reticulum chaperone BiP OS=Homo sapiens OX=9606 GN=HSPA5 PE=1 SV=2	42	24	22	654	72.3	5.16	1.19114e+07	1.41904e+07	1.23551e+07
P22894	Neutrophil collagenase OS=Homo sapiens OX=9606 GN=MMP8 PE=1 SV=1	37	14	14	467	53.4	6.87	2.53951e+07	3.52076e+07	2.94594e+07
P05089	Arginase-1 OS=Homo sapiens OX=9606 GN=ARG1 PE=1 SV=2	89	22	22	322	34.7	7.21	2.63068e+07	3.67688e+07	3.13484e+07
P48595	Serpin B10 OS=Homo sapiens OX=9606 GN=SERPINB10 PE=1 SV=1	71	27	27	397	45.4	6.16	1.83176e+07	2.51601e+07	1.72835e+07	Acetyl [N-Term]
P08758	Annexin A5 OS=Homo sapiens OX=9606 GN=ANXA5 PE=1 SV=2	62	19	19	320	35.9	5.05	1.80999e+07	2.48518e+07	2.08021e+07
P18669	Phosphoglycerate mutase 1 OS=Homo sapiens OX=9606 GN=PGAM1 PE=1 SV=2	61	13	13	254	28.8	7.18	4.07912e+07	6.25028e+07	4.90565e+07
Q9Y490	Talin-1 OS=Homo sapiens OX=9606 GN=TLN1 PE=1 SV=3	11	24	24	2541	269.6	6.07	1.07964e+07	1.32321e+07	1.11958e+07
P62937	Peptidyl-prolyl cis-trans isomerase A OS=Homo sapiens OX=9606 GN=PPIA PE=1 SV=2	60	11	11	165	18	7.81	1.3521e+08	1.69459e+08	1.25571e+08
P13647	Keratin, type II cytoskeletal 5 OS=Homo sapiens OX=9606 GN=KRT5 PE=1 SV=3	33	24	11	590	62.3	7.74	861055	6.4595e+06	1.04146e+06
P52566	Rho GDP-dissociation inhibitor 2 OS=Homo sapiens OX=9606 GN=ARHGDIB PE=1 SV=3	56	10	10	201	23	5.21	7.93425e+07	1.00607e+08	8.29016e+07
P17927	Complement receptor type 1 OS=Homo sapiens OX=9606 GN=CR1 PE=1 SV=3	33	22	22	2039	223.5	6.95	8.53079e+06	1.1561e+07	8.96407e+06
P02533	Keratin, type I cytoskeletal 14 OS=Homo sapiens OX=9606 GN=KRT14 PE=1 SV=4	46	22	9	472	51.5	5.16	440271	5.74879e+06	603675
P08246	Neutrophil elastase OS=Homo sapiens OX=9606 GN=ELANE PE=1 SV=1	43	8	8	267	28.5	9.35	5.61456e+07	7.54025e+07	5.94567e+07
P27695	DNA-(apurinic or apyrimidinic site) endonuclease OS=Homo sapiens OX=9606 GN=APEX1 PE=1 SV=2	61	16	16	318	35.5	8.12	1.56677e+07	1.95928e+07	1.93429e+07
P00338	L-lactate dehydrogenase A chain OS=Homo sapiens OX=9606 GN=LDHA PE=1 SV=2	51	17	16	332	36.7	8.27	2.82854e+07	3.55256e+07	3.33628e+07
P37802	Transgelin-2 OS=Homo sapiens OX=9606 GN=TAGLN2 PE=1 SV=3	51	10	10	199	22.4	8.25	1.81416e+07	2.3411e+07	1.76599e+07
P07900	Heat shock protein HSP 90-alpha OS=Homo sapiens OX=9606 GN=HSP90AA1 PE=1 SV=5	33	24	14	732	84.6	5.02	8.15766e+06	8.81926e+06	8.01684e+06
P05107	Integrin beta-2 OS=Homo sapiens OX=9606 GN=ITGB2 PE=1 SV=2	32	22	22	769	84.7	6.95	7.69531e+06	9.32446e+06	9.02268e+06
P32320	Cytidine deaminase OS=Homo sapiens OX=9606 GN=CDA PE=1 SV=2	62	6	6	146	16.2	6.92	4.68136e+07	6.22312e+07	5.63546e+07
P07195	L-lactate dehydrogenase B chain OS=Homo sapiens OX=9606 GN=LDHB PE=1 SV=2	43	13	12	334	36.6	6.05	2.02633e+07	2.40828e+07	2.30826e+07
Q01082	Spectrin beta chain, non-erythrocytic 1 OS=Homo sapiens OX=9606 GN=SPTBN1 PE=1 SV=2	12	22	20	2364	274.4	5.57	3.78149e+06	4.99218e+06	4.06436e+06
P31146	Coronin-1A OS=Homo sapiens OX=9606 GN=CORO1A PE=1 SV=4	31	19	19	461	51	6.68	6.05767e+07	6.52912e+07	5.13318e+07
P09972	Fructose-bisphosphate aldolase C OS=Homo sapiens OX=9606 GN=ALDOC PE=1 SV=2	43	14	11	364	39.4	6.87	1.56894e+07	1.75418e+07	1.31821e+07
P02671	Fibrinogen alpha chain OS=Homo sapiens OX=9606 GN=FGA PE=1 SV=2	20	16	16	866	94.9	6.01	4.62201e+07	5.62022e+07	4.96039e+07
O75368	SH3 domain-binding glutamic acid-rich-like protein OS=Homo sapiens OX=9606 GN=SH3BGRL PE=1 SV=1	85	11	11	114	12.8	5.25	2.65347e+07	3.50856e+07	31392910
P30086	Phosphatidylethanolamine-binding protein 1 OS=Homo sapiens OX=9606 GN=PEBP1 PE=1 SV=3	81	13	13	187	21	7.53	1.961e+07	2.44818e+07	2.21515e+07
Q6P4A8	Phospholipase B-like 1 OS=Homo sapiens OX=9606 GN=PLBD1 PE=1 SV=2	35	17	17	553	63.2	9.06	1.21224e+07	1.61774e+07	1.36315e+07
P63104	14-3-3 protein zeta/delta OS=Homo sapiens OX=9606 GN=YWHAZ PE=1 SV=1	39	11	9	245	27.7	4.79	1.63053e+07	1.73031e+07	1.42313e+07
P01834	Immunoglobulin kappa constant OS=Homo sapiens OX=9606 GN=IGKC PE=1 SV=2	81	7	7	107	11.8	6.52	1.08745e+07	1.56342e+07	1.23611e+07
O75594	Peptidoglycan recognition protein 1 OS=Homo sapiens OX=9606 GN=PGLYRP1 PE=1 SV=1	53	6	6	196	21.7	8.59	1.03572e+08	1.39337e+08	1.36499e+08
O14818	Proteasome subunit alpha type-7 OS=Homo sapiens OX=9606 GN=PSMA7 PE=1 SV=1	65	15	15	248	27.9	8.46	2.27615e+07	2.71409e+07	2.40395e+07
P49913	Cathelicidin antimicrobial peptide OS=Homo sapiens OX=9606 GN=CAMP PE=1 SV=1	52	11	11	170	19.3	9.41	1.77288e+08	2.14549e+08	1.91065e+08
P25787	Proteasome subunit alpha type-2 OS=Homo sapiens OX=9606 GN=PSMA2 PE=1 SV=2	47	10	10	234	25.9	7.43	5.89181e+06	7.64953e+06	6.17045e+06
P01857	Immunoglobulin heavy constant gamma 1 OS=Homo sapiens OX=9606 GN=IGHG1 PE=1 SV=1	56	12	6	330	36.1	8.19	2.43658e+07	3.18962e+07	3.08373e+07
P78417	Glutathione S-transferase omega-1 OS=Homo sapiens OX=9606 GN=GSTO1 PE=1 SV=2	64	18	18	241	27.5	6.6	2.14691e+07	2.836e+07	2.37257e+07
P25789	Proteasome subunit alpha type-4 OS=Homo sapiens OX=9606 GN=PSMA4 PE=1 SV=1	63	13	13	261	29.5	7.72	1.15729e+07	1.3099e+07	9.03596e+06
P60900	Proteasome subunit alpha type-6 OS=Homo sapiens OX=9606 GN=PSMA6 PE=1 SV=1	56	15	15	246	27.4	6.76	1.49337e+07	1.84676e+07	1.57169e+07
P26583	High mobility group protein B2 OS=Homo sapiens OX=9606 GN=HMGB2 PE=1 SV=2	38	11	9	209	24	7.81	3.99799e+07	5.3101e+07	4.62874e+07
Q9BRF8	Serine/threonine-protein phosphatase CPPED1 OS=Homo sapiens OX=9606 GN=CPPED1 PE=1 SV=3	56	12	12	314	35.5	6.2	1.05648e+07	1.38621e+07	1.25135e+07
P61626	Lysozyme C OS=Homo sapiens OX=9606 GN=LYZ PE=1 SV=1	67	10	10	148	16.5	9.16	5.29541e+08	7.01549e+08	5.62705e+08
P28799	Progranulin OS=Homo sapiens OX=9606 GN=GRN PE=1 SV=2	27	9	9	593	63.5	6.83	1.60149e+07	2.44334e+07	2.19605e+07
P11678	Eosinophil peroxidase OS=Homo sapiens OX=9606 GN=EPX PE=1 SV=2	25	19	14	715	81	10.29	5.69276e+06	6.61416e+06	6.54083e+06
Q96C19	EF-hand domain-containing protein D2 OS=Homo sapiens OX=9606 GN=EFHD2 PE=1 SV=1	40	11	11	240	26.7	5.2	1.10547e+07	1.59061e+07	1.26979e+07
P28062	Proteasome subunit beta type-8 OS=Homo sapiens OX=9606 GN=PSMB8 PE=1 SV=3	53	10	10	276	30.3	7.43	5.84008e+06	9.48418e+06	8.3302e+06
O75083	WD repeat-containing protein 1 OS=Homo sapiens OX=9606 GN=WDR1 PE=1 SV=4	29	13	13	606	66.2	6.65	1.42122e+07	1.80417e+07	1.64282e+07
P62987	Ubiquitin-60S ribosomal protein L40 OS=Homo sapiens OX=9606 GN=UBA52 PE=1 SV=2	56	12	12	128	14.7	9.83	6.48058e+07	7.37872e+07	6.86544e+07
P27918	Properdin OS=Homo sapiens OX=9606 GN=CFP PE=1 SV=2	29	10	10	469	51.2	7.9	1.62146e+07	2.50488e+07	2.10983e+07
P27797	Calreticulin OS=Homo sapiens OX=9606 GN=CALR PE=1 SV=1	55	16	16	417	48.1	4.44	1.31554e+07	1.80544e+07	1.70833e+07
P00747	Plasminogen OS=Homo sapiens OX=9606 GN=PLG PE=1 SV=2	31	18	18	810	90.5	7.24	6.69969e+06	9.41573e+06	8.97926e+06
P08133	Annexin A6 OS=Homo sapiens OX=9606 GN=ANXA6 PE=1 SV=3	31	16	16	673	75.8	5.6	4.14752e+06	5.50278e+06	5.32814e+06
O43451	Maltase-glucoamylase, intestinal OS=Homo sapiens OX=9606 GN=MGAM PE=1 SV=5	13	17	17	1857	209.7	5.5	5.17975e+06	6.58472e+06	5.91892e+06
P17174	Aspartate aminotransferase, cytoplasmic OS=Homo sapiens OX=9606 GN=GOT1 PE=1 SV=3	50	15	15	413	46.2	7.01	6.70539e+06	7.98196e+06	6.69453e+06
P60660	Myosin light polypeptide 6 OS=Homo sapiens OX=9606 GN=MYL6 PE=1 SV=2	58	9	9	151	16.9	4.65	2.64614e+07	3.02035e+07	2.50462e+07
P00441	Superoxide dismutase [Cu-Zn] OS=Homo sapiens OX=9606 GN=SOD1 PE=1 SV=2	78	8	8	154	15.9	6.13	8.00575e+06	1.49119e+07	1.30938e+07
P20061	Transcobalamin-1 OS=Homo sapiens OX=9606 GN=TCN1 PE=1 SV=2	26	9	9	433	48.2	5.03	7.83297e+06	1.05007e+07	9373155
Q14019	Coactosin-like protein OS=Homo sapiens OX=9606 GN=COTL1 PE=1 SV=3	70	12	12	142	15.9	5.67	3.37387e+07	4.05973e+07	3.62193e+07
Q10588	ADP-ribosyl cyclase/cyclic ADP-ribose hydrolase 2 OS=Homo sapiens OX=9606 GN=BST1 PE=1 SV=2	38	12	12	318	35.7	7.8	1.16193e+07	1.63187e+07	1.48726e+07
P11413	Glucose-6-phosphate 1-dehydrogenase OS=Homo sapiens OX=9606 GN=G6PD PE=1 SV=4	33	17	17	515	59.2	6.84	2.13042e+07	2.64005e+07	2.10691e+07
P00918	Carbonic anhydrase 2 OS=Homo sapiens OX=9606 GN=CA2 PE=1 SV=2	59	10	10	260	29.2	7.4	9.488e+06	1.24087e+07	1.01555e+07
P25786	Proteasome subunit alpha type-1 OS=Homo sapiens OX=9606 GN=PSMA1 PE=1 SV=1	63	14	14	263	29.5	6.61	1.07726e+07	1.44132e+07	1.32999e+07
P08311	Cathepsin G OS=Homo sapiens OX=9606 GN=CTSG PE=1 SV=2	48	10	10	255	28.8	11.19	1.89224e+07	2.34403e+07	2.04233e+07
P48637	Glutathione synthetase OS=Homo sapiens OX=9606 GN=GSS PE=1 SV=1	42	16	16	474	52.4	5.92	5.1634e+06	6.55167e+06	5.62226e+06
P01876	Immunoglobulin heavy constant alpha 1 OS=Homo sapiens OX=9606 GN=IGHA1 PE=1 SV=2	44	10	6	353	37.6	6.51	9.66879e+06	1.0727e+07	9.03553e+06
P40925	Malate dehydrogenase, cytoplasmic OS=Homo sapiens OX=9606 GN=MDH1 PE=1 SV=4	37	10	10	334	36.4	7.36	3.23581e+07	4.2366e+07	3.9162e+07
P46926	Glucosamine-6-phosphate isomerase 1 OS=Homo sapiens OX=9606 GN=GNPDA1 PE=1 SV=1	68	13	13	289	32.6	6.92	3.76783e+06	5.24314e+06	4.21886e+06
P43490	Nicotinamide phosphoribosyltransferase OS=Homo sapiens OX=9606 GN=NAMPT PE=1 SV=1	31	14	14	491	55.5	7.15	7.298e+06	9.42651e+06	7.94285e+06
P02763	Alpha-1-acid glycoprotein 1 OS=Homo sapiens OX=9606 GN=ORM1 PE=1 SV=1	41	8	6	201	23.5	5.02	1.95065e+07	3.00775e+07	2.91786e+07
P08238	Heat shock protein HSP 90-beta OS=Homo sapiens OX=9606 GN=HSP90AB1 PE=1 SV=4	21	16	6	724	83.2	5.03	1.74804e+06	2.12683e+06	2.21905e+06
O75015	Low affinity immunoglobulin gamma Fc region receptor III-B OS=Homo sapiens OX=9606 GN=FCGR3B PE=1 SV=2	27	9	5	233	26.2	6.71	2.40121e+07	4.24131e+07	4.60761e+07
P52209	6-phosphogluconate dehydrogenase, decarboxylating OS=Homo sapiens OX=9606 GN=PGD PE=1 SV=3	23	11	11	483	53.1	7.23	1.8881e+07	2.41636e+07	1.94568e+07
O00560	Syntenin-1 OS=Homo sapiens OX=9606 GN=SDCBP PE=1 SV=1	52	11	11	298	32.4	7.53	4.39032e+06	5.87595e+06	5.8566e+06
P09211	Glutathione S-transferase P OS=Homo sapiens OX=9606 GN=GSTP1 PE=1 SV=2	55	8	8	210	23.3	5.64	6.09935e+06	8.23627e+06	6.83369e+06
P20700	Lamin-B1 OS=Homo sapiens OX=9606 GN=LMNB1 PE=1 SV=2	22	13	10	586	66.4	5.16	8.62902e+06	1.09154e+07	9.52497e+06
P16930	Fumarylacetoacetase OS=Homo sapiens OX=9606 GN=FAH PE=1 SV=2	34	10	10	419	46.3	6.95	4219751	5.91312e+06	5.11751e+06
P07384	Calpain-1 catalytic subunit OS=Homo sapiens OX=9606 GN=CAPN1 PE=1 SV=1	20	13	13	714	81.8	5.67	3.67067e+06	5.05622e+06	3.72271e+06
P15311	Ezrin OS=Homo sapiens OX=9606 GN=EZR PE=1 SV=4	21	15	7	586	69.4	6.27	2.55432e+06	3.87844e+06	3.80553e+06
Q16881	Thioredoxin reductase 1, cytoplasmic OS=Homo sapiens OX=9606 GN=TXNRD1 PE=1 SV=3	34	14	14	649	70.9	7.39	2.59526e+06	3.28808e+06	3.2689e+06
P06748	Nucleophosmin OS=Homo sapiens OX=9606 GN=NPM1 PE=1 SV=2	29	8	8	294	32.6	4.78	5.64503e+06	6.52972e+06	6.82423e+06
P43034	Platelet-activating factor acetylhydrolase IB subunit beta OS=Homo sapiens OX=9606 GN=PAFAH1B1 PE=1 SV=2	45	14	13	410	46.6	7.37	5.23951e+06	5.85424e+06	5.15878e+06
Q9HC38	Glyoxalase domain-containing protein 4 OS=Homo sapiens OX=9606 GN=GLOD4 PE=1 SV=1	57	13	13	313	34.8	5.6	1.51191e+07	1.8712e+07	1.51934e+07
O60486	Plexin-C1 OS=Homo sapiens OX=9606 GN=PLXNC1 PE=1 SV=1	9	10	10	1568	175.6	7.61	4.33405e+06	5.88065e+06	5.40398e+06
P40926	Malate dehydrogenase, mitochondrial OS=Homo sapiens OX=9606 GN=MDH2 PE=1 SV=3	52	13	13	338	35.5	8.68	4.84163e+06	5.61931e+06	4.90159e+06
P01860	Immunoglobulin heavy constant gamma 3 OS=Homo sapiens OX=9606 GN=IGHG3 PE=1 SV=2	49	13	6	377	41.3	7.9	2.59676e+06	3.35827e+06	3.08628e+06
P20618	Proteasome subunit beta type-1 OS=Homo sapiens OX=9606 GN=PSMB1 PE=1 SV=2	54	11	11	241	26.5	8.13	1.01729e+07	1.16052e+07	1.0471e+07
O00764	Pyridoxal kinase OS=Homo sapiens OX=9606 GN=PDXK PE=1 SV=1	37	9	9	312	35.1	6.13	5.12325e+06	6.90641e+06	5.8063e+06
P23284	Peptidyl-prolyl cis-trans isomerase B OS=Homo sapiens OX=9606 GN=PPIB PE=1 SV=2	51	12	12	216	23.7	9.41	9.81367e+06	1.19978e+07	1.12844e+07
Q04695	Keratin, type I cytoskeletal 17 OS=Homo sapiens OX=9606 GN=KRT17 PE=1 SV=2	33	15	9	432	48.1	5.02	1.76114e+06	6.23382e+06	2.2364e+06
P40121	Macrophage-capping protein OS=Homo sapiens OX=9606 GN=CAPG PE=1 SV=2	32	8	8	348	38.5	6.19	1.56067e+07	1.86e+07	1.50208e+07
Q92854	Semaphorin-4D OS=Homo sapiens OX=9606 GN=SEMA4D PE=1 SV=1	17	9	9	862	96.1	7.96	2.85647e+06	3.51966e+06	3.01527e+06
P62805	Histone H4 OS=Homo sapiens OX=9606 GN=H4C1 PE=1 SV=2	55	8	8	103	11.4	11.36	1.0699e+07	1.1903e+07	1.15411e+07
P10153	Non-secretory ribonuclease OS=Homo sapiens OX=9606 GN=RNASE2 PE=1 SV=2	21	4	4	161	18.3	8.73	6.11606e+06	8.06756e+06	7.11791e+06
P80511	Protein S100-A12 OS=Homo sapiens OX=9606 GN=S100A12 PE=1 SV=2	52	9	9	92	10.6	6.25	1.72939e+08	1.22753e+08	7.77417e+07
P49720	Proteasome subunit beta type-3 OS=Homo sapiens OX=9606 GN=PSMB3 PE=1 SV=2	48	7	7	205	22.9	6.55	5.11587e+06	6.56319e+06	5.35525e+06
O95336	6-phosphogluconolactonase OS=Homo sapiens OX=9606 GN=PGLS PE=1 SV=2	58	10	10	258	27.5	6.05	5.77881e+06	7.22602e+06	5.47055e+06
P41218	Myeloid cell nuclear differentiation antigen OS=Homo sapiens OX=9606 GN=MNDA PE=1 SV=1	26	9	9	407	45.8	9.76	1.04236e+07	1.23883e+07	1.04277e+07
Q9HD89	Resistin OS=Homo sapiens OX=9606 GN=RETN PE=1 SV=1	77	6	6	108	11.4	6.86	2.42114e+07	3.31301e+07	2.65016e+07
P01040	Cystatin-A OS=Homo sapiens OX=9606 GN=CSTA PE=1 SV=1	88	7	7	98	11	5.5	1.39666e+07	1.60393e+07	1.47132e+07	Acetyl [N-Term]
Q9UBW5	Bridging integrator 2 OS=Homo sapiens OX=9606 GN=BIN2 PE=1 SV=3	24	10	10	565	61.8	5.15	3.59239e+06	5.52016e+06	4.37333e+06
P14151	L-selectin OS=Homo sapiens OX=9606 GN=SELL PE=1 SV=2	17	7	7	372	42.2	6.6	1.55224e+07	1.76815e+07	1.6721e+07
P00558	Phosphoglycerate kinase 1 OS=Homo sapiens OX=9606 GN=PGK1 PE=1 SV=3	36	13	13	417	44.6	8.1	1.89721e+07	2.42014e+07	2.05582e+07
P51858	Hepatoma-derived growth factor OS=Homo sapiens OX=9606 GN=HDGF PE=1 SV=1	44	11	11	240	26.8	4.73	8.04373e+06	1.0234e+07	9.52048e+06
P46976	Glycogenin-1 OS=Homo sapiens OX=9606 GN=GYG1 PE=1 SV=4	16	6	6	350	39.4	5.53	2.26868e+07	3.00284e+07	2.65816e+07
P27105	Stomatin OS=Homo sapiens OX=9606 GN=STOM PE=1 SV=3	34	11	11	288	31.7	7.88	3.83031e+06	4.31108e+06	3.67895e+06
P80723	Brain acid soluble protein 1 OS=Homo sapiens OX=9606 GN=BASP1 PE=1 SV=2	52	8	8	227	22.7	4.63	2.7814e+07	3.00728e+07	2.54372e+07
P25788	Proteasome subunit alpha type-3 OS=Homo sapiens OX=9606 GN=PSMA3 PE=1 SV=2	32	9	9	255	28.4	5.33	9.11657e+06	9.4346e+06	8.45563e+06
P19652	Alpha-1-acid glycoprotein 2 OS=Homo sapiens OX=9606 GN=ORM2 PE=1 SV=2	40	7	5	201	23.6	5.11	3.22796e+06	4.60661e+06	3.59193e+06
P49247	Ribose-5-phosphate isomerase OS=Homo sapiens OX=9606 GN=RPIA PE=1 SV=3	32	8	8	311	33.2	8.54	6.50252e+06	7.97623e+06	7.64905e+06
P41439	Folate receptor gamma OS=Homo sapiens OX=9606 GN=FOLR3 PE=1 SV=2	37	9	9	245	27.9	7.66	5.28363e+06	7.06192e+06	5.62804e+06
P22626	Heterogeneous nuclear ribonucleoproteins A2/B1 OS=Homo sapiens OX=9606 GN=HNRNPA2B1 PE=1 SV=2	37	11	11	353	37.4	8.95	1.27745e+07	1.50781e+07	1.28959e+07
P09960	Leukotriene A-4 hydrolase OS=Homo sapiens OX=9606 GN=LTA4H PE=1 SV=2	21	12	12	611	69.2	6.18	5.93876e+06	8.23092e+06	6.79408e+06
P47756	F-actin-capping protein subunit beta OS=Homo sapiens OX=9606 GN=CAPZB PE=1 SV=4	39	11	11	277	31.3	5.59	8.61917e+06	1.0131e+07	7.95332e+06
O00391	Sulfhydryl oxidase 1 OS=Homo sapiens OX=9606 GN=QSOX1 PE=1 SV=3	15	10	10	747	82.5	8.92	3.24455e+06	4.41401e+06	3.46842e+06
Q14766	Latent-transforming growth factor beta-binding protein 1 OS=Homo sapiens OX=9606 GN=LTBP1 PE=1 SV=4	9	10	10	1721	186.7	5.96	2.62867e+06	3.64031e+06	2.99037e+06
P01871	Immunoglobulin heavy constant mu OS=Homo sapiens OX=9606 GN=IGHM PE=1 SV=4	33	11	11	453	49.4	6.77	4.40124e+06	5.65582e+06	4.75774e+06
P09429	High mobility group protein B1 OS=Homo sapiens OX=9606 GN=HMGB1 PE=1 SV=3	44	8	6	215	24.9	5.74	4.12799e+06	7.48351e+06	6.04884e+06
P31949	Protein S100-A11 OS=Homo sapiens OX=9606 GN=S100A11 PE=1 SV=2	52	5	5	105	11.7	7.12	2.9597e+07	3.72445e+07	2.50933e+07
P28066	Proteasome subunit alpha type-5 OS=Homo sapiens OX=9606 GN=PSMA5 PE=1 SV=3	52	10	10	241	26.4	4.79	8.55096e+06	1.00096e+07	8.36384e+06
Q9P258	Protein RCC2 OS=Homo sapiens OX=9606 GN=RCC2 PE=1 SV=2	30	11	11	522	56	8.78	2.1388e+06	3.7594e+06	2.31585e+06
O14950	Myosin regulatory light chain 12B OS=Homo sapiens OX=9606 GN=MYL12B PE=1 SV=2	52	7	7	172	19.8	4.84	1.25294e+07	1.68723e+07	1.37167e+07
Q15631	Translin OS=Homo sapiens OX=9606 GN=TSN PE=1 SV=1	43	8	8	228	26.2	6.44	3.8526e+06	5.13101e+06	4.29007e+06
P50552	Vasodilator-stimulated phosphoprotein OS=Homo sapiens OX=9606 GN=VASP PE=1 SV=3	14	7	7	380	39.8	8.94	1.30735e+07	1.66121e+07	1.66574e+07
P27824	Calnexin OS=Homo sapiens OX=9606 GN=CANX PE=1 SV=2	16	9	9	592	67.5	4.6	4.09684e+06	5.04783e+06	4.4906e+06
P11766	Alcohol dehydrogenase class-3 OS=Homo sapiens OX=9606 GN=ADH5 PE=1 SV=4	34	9	9	374	39.7	7.49	2.88098e+06	3.69274e+06	3.55483e+06
P50995	Annexin A11 OS=Homo sapiens OX=9606 GN=ANXA11 PE=1 SV=1	20	12	12	505	54.4	7.65	2.84938e+06	3927953	4.22428e+06
O95834	Echinoderm microtubule-associated protein-like 2 OS=Homo sapiens OX=9606 GN=EML2 PE=1 SV=1	23	11	11	649	70.6	6.32	2.39087e+06	2.92401e+06	2.61768e+06
P08575	Receptor-type tyrosine-protein phosphatase C OS=Homo sapiens OX=9606 GN=PTPRC PE=1 SV=3	8	10	10	1306	147.4	6.15	1.17894e+07	1.41839e+07	1.1378e+07
Q9H299	SH3 domain-binding glutamic acid-rich-like protein 3 OS=Homo sapiens OX=9606 GN=SH3BGRL3 PE=1 SV=1	32	4	4	93	10.4	4.93	4.4435e+07	5.16917e+07	4.22224e+07
P51149	Ras-related protein Rab-7a OS=Homo sapiens OX=9606 GN=RAB7A PE=1 SV=1	57	9	9	207	23.5	6.7	2.76445e+06	3.45581e+06	2.72365e+06
P04406	Glyceraldehyde-3-phosphate dehydrogenase OS=Homo sapiens OX=9606 GN=GAPDH PE=1 SV=3	40	9	9	335	36	8.46	3.42612e+06	4.20273e+06	2.2365e+06
P04217	Alpha-1B-glycoprotein OS=Homo sapiens OX=9606 GN=A1BG PE=1 SV=4	23	8	8	495	54.2	5.86	3.61394e+06	4.38586e+06	3.7041e+06
Q9ULZ3	Apoptosis-associated speck-like protein containing a CARD OS=Homo sapiens OX=9606 GN=PYCARD PE=1 SV=2	39	7	7	195	21.6	6.34	6.40025e+06	8.44155e+06	7.52845e+06
P25774	Cathepsin S OS=Homo sapiens OX=9606 GN=CTSS PE=1 SV=3	38	11	11	331	37.5	8.34	6.84719e+06	8.66688e+06	8.23173e+06
P40306	Proteasome subunit beta type-10 OS=Homo sapiens OX=9606 GN=PSMB10 PE=1 SV=1	27	6	6	273	28.9	7.81	3.19266e+06	4.16245e+06	3.8065e+06
P62258	14-3-3 protein epsilon OS=Homo sapiens OX=9606 GN=YWHAE PE=1 SV=1	43	11	9	255	29.2	4.74	3.37509e+06	4.15959e+06	3.49707e+06	Acetyl [N-Term]
P02750	Leucine-rich alpha-2-glycoprotein OS=Homo sapiens OX=9606 GN=LRG1 PE=1 SV=2	35	8	8	347	38.2	6.95	5.16702e+06	7.09393e+06	6.37869e+06
P29350	Tyrosine-protein phosphatase non-receptor type 6 OS=Homo sapiens OX=9606 GN=PTPN6 PE=1 SV=1	16	8	8	595	67.5	7.78	3.53061e+06	2.90327e+06	2.81284e+06
P35237	Serpin B6 OS=Homo sapiens OX=9606 GN=SERPINB6 PE=1 SV=3	36	10	9	376	42.6	5.27	1.44833e+06	1.80503e+06	1.07112e+06
Q9ULV4	Coronin-1C OS=Homo sapiens OX=9606 GN=CORO1C PE=1 SV=1	25	8	8	474	53.2	7.08	1.6057e+06	2.0367e+06	1.61675e+06
P78324	Tyrosine-protein phosphatase non-receptor type substrate 1 OS=Homo sapiens OX=9606 GN=SIRPA PE=1 SV=2	22	8	7	504	54.9	6.98	3.34489e+06	4.20997e+06	4.07389e+06
Q8N6Q3	CD177 antigen OS=Homo sapiens OX=9606 GN=CD177 PE=1 SV=2	26	8	8	437	46.3	6.29	4.73864e+06	7.03069e+06	5.09905e+06
P12724	Eosinophil cationic protein OS=Homo sapiens OX=9606 GN=RNASE3 PE=1 SV=2	37	6	6	160	18.4	10.02	2.19759e+07	31276771	2.59659e+07
P13716	Delta-aminolevulinic acid dehydratase OS=Homo sapiens OX=9606 GN=ALAD PE=1 SV=1	30	8	8	330	36.3	6.79	4.41041e+06	5.52594e+06	3.75173e+06
P07359	Platelet glycoprotein Ib alpha chain OS=Homo sapiens OX=9606 GN=GP1BA PE=1 SV=2	14	8	8	652	71.5	6.29	5.29203e+06	7.50039e+06	6.99765e+06
P0DOY2	Immunoglobulin lambda constant 2 OS=Homo sapiens OX=9606 GN=IGLC2 PE=1 SV=1	67	6	3	106	11.3	7.24	396904	451328	110801
P04004	Vitronectin OS=Homo sapiens OX=9606 GN=VTN PE=1 SV=1	19	8	8	478	54.3	5.8	4.92965e+06	5.65406e+06	5.77318e+06
Q6IBS0	Twinfilin-2 OS=Homo sapiens OX=9606 GN=TWF2 PE=1 SV=2	15	4	4	349	39.5	6.84	1.35451e+06	1.93592e+06	1.33517e+06
P62942	Peptidyl-prolyl cis-trans isomerase FKBP1A OS=Homo sapiens OX=9606 GN=FKBP1A PE=1 SV=2	30	4	4	108	11.9	8.16	4.29622e+06	5.56507e+06	2.89931e+06
P02775	Platelet basic protein OS=Homo sapiens OX=9606 GN=PPBP PE=1 SV=3	38	6	6	128	13.9	8.79	7.84609e+06	1.01133e+07	8.52675e+06
Q15907	Ras-related protein Rab-11B OS=Homo sapiens OX=9606 GN=RAB11B PE=1 SV=4	47	9	9	218	24.5	5.94	4.16516e+06	5.39008e+06	4.42509e+06
P31997	Carcinoembryonic antigen-related cell adhesion molecule 8 OS=Homo sapiens OX=9606 GN=CEACAM8 PE=1 SV=2	24	6	5	349	38.1	7.39	9.0137e+06	1.08771e+07	7.70778e+06
P09467	Fructose-1,6-bisphosphatase 1 OS=Homo sapiens OX=9606 GN=FBP1 PE=1 SV=5	31	7	6	338	36.8	6.99	1.63943e+06	2.15648e+06	1.87026e+06
P26641	Elongation factor 1-gamma OS=Homo sapiens OX=9606 GN=EEF1G PE=1 SV=3	16	7	7	437	50.1	6.67	3.66776e+06	5.04414e+06	4.00958e+06
P22392	Nucleoside diphosphate kinase B OS=Homo sapiens OX=9606 GN=NME2 PE=1 SV=1	56	8	4	152	17.3	8.41	2.63474e+06	3.17314e+06	1.43855e+06
Q9H0W9	Ester hydrolase C11orf54 OS=Homo sapiens OX=9606 GN=C11orf54 PE=1 SV=1	35	6	6	315	35.1	6.7	1.31528e+06	2.58975e+06	1.9323e+06
P28070	Proteasome subunit beta type-4 OS=Homo sapiens OX=9606 GN=PSMB4 PE=1 SV=4	38	7	7	264	29.2	5.97	6.73376e+06	8.06174e+06	6.56555e+06
P04899	Guanine nucleotide-binding protein G(i) subunit alpha-2 OS=Homo sapiens OX=9606 GN=GNAI2 PE=1 SV=3	37	10	10	355	40.4	5.54	2.39403e+06	2.50514e+06	2.85574e+06
P54108	Cysteine-rich secretory protein 3 OS=Homo sapiens OX=9606 GN=CRISP3 PE=1 SV=1	43	6	6	245	27.6	7.8	1.48588e+07	1.88876e+07	1.81032e+07
P50452	Serpin B8 OS=Homo sapiens OX=9606 GN=SERPINB8 PE=1 SV=2	30	11	9	374	42.7	5.57	1.53305e+06	1.97004e+06	1.48562e+06
P02774	Vitamin D-binding protein OS=Homo sapiens OX=9606 GN=GC PE=1 SV=2	25	8	8	474	52.9	5.45	2.28742e+06	2.69011e+06	2.46617e+06
Q96G03	Phosphoglucomutase-2 OS=Homo sapiens OX=9606 GN=PGM2 PE=1 SV=4	21	10	10	612	68.2	6.73	2.61163e+06	3.35586e+06	2.82071e+06
P0DP25	Calmodulin-3 OS=Homo sapiens OX=9606 GN=CALM3 PE=1 SV=1	43	6	6	149	16.8	4.22	4.33399e+07	4.87266e+07	4.68316e+07
P04179	Superoxide dismutase [Mn], mitochondrial OS=Homo sapiens OX=9606 GN=SOD2 PE=1 SV=3	34	5	5	222	24.7	8.25	1.65989e+06	2.89063e+06	2.30234e+06
P28065	Proteasome subunit beta type-9 OS=Homo sapiens OX=9606 GN=PSMB9 PE=1 SV=2	38	6	6	219	23.3	5.03	5.21318e+06	7.16686e+06	5.72415e+06
P39687	Acidic leucine-rich nuclear phosphoprotein 32 family member A OS=Homo sapiens OX=9606 GN=ANP32A PE=1 SV=1	30	9	5	249	28.6	4.09	2.92045e+06	3.6979e+06	3.1504e+06
P33241	Lymphocyte-specific protein 1 OS=Homo sapiens OX=9606 GN=LSP1 PE=1 SV=1	22	5	5	339	37.2	4.74	1.67588e+07	2.31814e+07	2.27276e+07
P61970	Nuclear transport factor 2 OS=Homo sapiens OX=9606 GN=NUTF2 PE=1 SV=1	69	5	5	127	14.5	5.38	2.40233e+06	4.35111e+06	3.16893e+06
P14550	Aldo-keto reductase family 1 member A1 OS=Homo sapiens OX=9606 GN=AKR1A1 PE=1 SV=3	39	9	9	325	36.6	6.79	1.6528e+06	2.19425e+06	1.77236e+06
P49721	Proteasome subunit beta type-2 OS=Homo sapiens OX=9606 GN=PSMB2 PE=1 SV=1	46	8	8	201	22.8	7.02	5.96563e+06	7.2775e+06	6.84109e+06
P61769	Beta-2-microglobulin OS=Homo sapiens OX=9606 GN=B2M PE=1 SV=1	38	4	4	119	13.7	6.52	1.53549e+07	1.79078e+07	1.74084e+07
P11717	Cation-independent mannose-6-phosphate receptor OS=Homo sapiens OX=9606 GN=IGF2R PE=1 SV=3	5	10	10	2491	274.2	5.94	4.84361e+06	6.27723e+06	5.617e+06
Q12913	Receptor-type tyrosine-protein phosphatase eta OS=Homo sapiens OX=9606 GN=PTPRJ PE=1 SV=3	8	8	8	1337	145.9	5.58	1.34685e+06	1.72991e+06	1.4734e+06
P09651	Heterogeneous nuclear ribonucleoprotein A1 OS=Homo sapiens OX=9606 GN=HNRNPA1 PE=1 SV=5	24	6	6	372	38.7	9.13	4.11749e+06	5.77991e+06	5.33038e+06
Q5QNW6	Histone H2B type 2-F OS=Homo sapiens OX=9606 GN=H2BC18 PE=1 SV=3	41	6	6	126	13.9	10.32	1.98325e+07	1.18105e+07	8.78924e+06
Q9Y5Z4	Heme-binding protein 2 OS=Homo sapiens OX=9606 GN=HEBP2 PE=1 SV=1	37	7	7	205	22.9	4.63	2.67794e+06	3124640	2.84356e+06
P16083	Ribosyldihydronicotinamide dehydrogenase [quinone] OS=Homo sapiens OX=9606 GN=NQO2 PE=1 SV=5	37	6	6	231	25.9	6.29	2.88514e+06	3.67253e+06	2.91925e+06
O00299	Chloride intracellular channel protein 1 OS=Homo sapiens OX=9606 GN=CLIC1 PE=1 SV=4	47	8	8	241	26.9	5.17	4.68338e+06	5.41181e+06	5.15311e+06
P20073	Annexin A7 OS=Homo sapiens OX=9606 GN=ANXA7 PE=1 SV=3	19	7	7	488	52.7	5.68	2.15e+06	2.72261e+06	2.68966e+06
P25815	Protein S100-P OS=Homo sapiens OX=9606 GN=S100P PE=1 SV=2	54	6	6	95	10.4	4.88	1.21056e+08	1.33538e+08	1.18108e+08
P35606	Coatomer subunit beta' OS=Homo sapiens OX=9606 GN=COPB2 PE=1 SV=2	15	8	8	906	102.4	5.27	3.36384e+06	3.62944e+06	3.28035e+06
P62993	Growth factor receptor-bound protein 2 OS=Homo sapiens OX=9606 GN=GRB2 PE=1 SV=1	29	6	6	217	25.2	6.32	6.58583e+06	9.42396e+06	8.64694e+06
P08637	Low affinity immunoglobulin gamma Fc region receptor III-A OS=Homo sapiens OX=9606 GN=FCGR3A PE=1 SV=2	19	6	2	254	29.1	8.07	1.16957e+07	1.32735e+07	1.22826e+07
P52565	Rho GDP-dissociation inhibitor 1 OS=Homo sapiens OX=9606 GN=ARHGDIA PE=1 SV=3	24	4	4	204	23.2	5.11	4.46344e+06	5.04251e+06	5.25712e+06
O75347	Tubulin-specific chaperone A OS=Homo sapiens OX=9606 GN=TBCA PE=1 SV=3	61	10	10	108	12.8	5.29	3.94265e+06	5.21046e+06	4.6467e+06
P61224	Ras-related protein Rap-1b OS=Homo sapiens OX=9606 GN=RAP1B PE=1 SV=1	39	8	7	184	20.8	5.78	2.35286e+06	2.98413e+06	2.8044e+06
P15531	Nucleoside diphosphate kinase A OS=Homo sapiens OX=9606 GN=NME1 PE=1 SV=1	46	6	2	152	17.1	6.19	819443	969102	891259
P01042	Kininogen-1 OS=Homo sapiens OX=9606 GN=KNG1 PE=1 SV=2	9	6	6	644	71.9	6.81	2.51261e+06	2.79391e+06	2.61356e+06
P07602	Prosaposin OS=Homo sapiens OX=9606 GN=PSAP PE=1 SV=2	13	8	8	524	58.1	5.17	6.60526e+06	7.65606e+06	6.11137e+06
P08567	Pleckstrin OS=Homo sapiens OX=9606 GN=PLEK PE=1 SV=3	15	4	4	350	40.1	8.28	3.15642e+06	7.33638e+06	6.35476e+06
P55072	Transitional endoplasmic reticulum ATPase OS=Homo sapiens OX=9606 GN=VCP PE=1 SV=4	8	6	6	806	89.3	5.26	2.99051e+06	3.70727e+06	3.38676e+06
P17931	Galectin-3 OS=Homo sapiens OX=9606 GN=LGALS3 PE=1 SV=5	26	5	5	250	26.1	8.56	2.6677e+06	3798146	3.17679e+06
P28676	Grancalcin OS=Homo sapiens OX=9606 GN=GCA PE=1 SV=2	35	8	8	217	24	5.21	2.85807e+06	3.87902e+06	3.17259e+06
O95498	Vascular non-inflammatory molecule 2 OS=Homo sapiens OX=9606 GN=VNN2 PE=1 SV=3	21	6	6	520	58.5	6.52	1.65782e+06	2.49067e+06	1.66582e+06
Q03252	Lamin-B2 OS=Homo sapiens OX=9606 GN=LMNB2 PE=1 SV=4	14	8	5	620	69.9	5.59	1.13566e+06	1.53275e+06	1.2195e+06
O00584	Ribonuclease T2 OS=Homo sapiens OX=9606 GN=RNASET2 PE=1 SV=2	31	7	7	256	29.5	7.08	5.96531e+06	6.18778e+06	6.47682e+06
P61158	Actin-related protein 3 OS=Homo sapiens OX=9606 GN=ACTR3 PE=1 SV=3	18	7	7	418	47.3	5.88	6.05282e+06	7.2159e+06	6.45071e+06
P14618	Pyruvate kinase PKM OS=Homo sapiens OX=9606 GN=PKM PE=1 SV=4	16	6	6	531	57.9	7.84	3.3844e+06	3.88807e+06	3.81199e+06
P01877	Immunoglobulin heavy constant alpha 2 OS=Homo sapiens OX=9606 GN=IGHA2 PE=1 SV=4	32	6	2	340	36.6	6.27	259508	409328	345093
P42331	Rho GTPase-activating protein 25 OS=Homo sapiens OX=9606 GN=ARHGAP25 PE=1 SV=2	17	9	9	645	73.4	6.37	1.81637e+06	2.12912e+06	1.84535e+06
Q01105	Protein SET OS=Homo sapiens OX=9606 GN=SET PE=1 SV=3	23	5	5	290	33.5	4.32	3.36068e+06	4.03935e+06	3.76146e+06
Q92820	Gamma-glutamyl hydrolase OS=Homo sapiens OX=9606 GN=GGH PE=1 SV=2	29	8	8	318	35.9	7.11	2.47301e+06	2.80578e+06	1.47625e+07
O15144	Actin-related protein 2/3 complex subunit 2 OS=Homo sapiens OX=9606 GN=ARPC2 PE=1 SV=1	11	4	4	300	34.3	7.36	1.09927e+07	1.39318e+07	1.23999e+07
P99999	Cytochrome c OS=Homo sapiens OX=9606 GN=CYCS PE=1 SV=2	58	7	7	105	11.7	9.57	4612001	5.99219e+06	5.50334e+06
Q99598	Translin-associated protein X OS=Homo sapiens OX=9606 GN=TSNAX PE=1 SV=1	31	6	6	290	33.1	6.55	1.80662e+06	1.88131e+06	1.81769e+06
Q96QH2	PML-RARA-regulated adapter molecule 1 OS=Homo sapiens OX=9606 GN=PRAM1 PE=1 SV=3	9	7	7	670	73.9	9.67	1.74762e+06	2.49059e+06	2.2841e+06
P04080	Cystatin-B OS=Homo sapiens OX=9606 GN=CSTB PE=1 SV=2	70	4	4	98	11.1	7.56	3.61245e+06	4.77002e+06	3.88724e+06	Acetyl [N-Term]
P00450	Ceruloplasmin OS=Homo sapiens OX=9606 GN=CP PE=1 SV=1	8	7	7	1065	122.1	5.72	4.33568e+06	6.3059e+06	4.26464e+06
Q0VD83	Apolipoprotein B receptor OS=Homo sapiens OX=9606 GN=APOBR PE=1 SV=3	6	6	6	1097	115.6	4.4	3.42342e+06	4.31779e+06	3.93054e+06
P52907	F-actin-capping protein subunit alpha-1 OS=Homo sapiens OX=9606 GN=CAPZA1 PE=1 SV=3	30	5	5	286	32.9	5.69	1.55457e+06	1.82888e+06	1.13112e+06
Q16531	DNA damage-binding protein 1 OS=Homo sapiens OX=9606 GN=DDB1 PE=1 SV=1	9	7	7	1140	126.9	5.26	1.21655e+06	1.78682e+06	1.58719e+06
P06737	Glycogen phosphorylase, liver form OS=Homo sapiens OX=9606 GN=PYGL PE=1 SV=4	8	8	8	847	97.1	7.17	1.81457e+07	2.17071e+07	2.03226e+07
P12956	X-ray repair cross-complementing protein 6 OS=Homo sapiens OX=9606 GN=XRCC6 PE=1 SV=2	12	6	6	609	69.8	6.64	875526	1.18767e+06	878685
Q7L266	Isoaspartyl peptidase/L-asparaginase OS=Homo sapiens OX=9606 GN=ASRGL1 PE=1 SV=2	26	6	6	308	32	6.24	1.00257e+06	1.30532e+06	1.10138e+06	Acetyl [N-Term]
O00602	Ficolin-1 OS=Homo sapiens OX=9606 GN=FCN1 PE=1 SV=2	27	7	7	326	35.1	6.86	3.95627e+06	4.61878e+06	5.00973e+06
Q13630	GDP-L-fucose synthase OS=Homo sapiens OX=9606 GN=GFUS PE=1 SV=1	26	7	7	321	35.9	6.6	2.6617e+06	3.19852e+06	2.93609e+06
P26447	Protein S100-A4 OS=Homo sapiens OX=9606 GN=S100A4 PE=1 SV=1	37	4	4	101	11.7	6.11	1.42219e+07	1.88467e+07	1.13405e+07
P20160	Azurocidin OS=Homo sapiens OX=9606 GN=AZU1 PE=1 SV=3	26	4	4	251	26.9	9.5	9.76561e+06	1.27201e+07	1.09394e+07
Q9UJ68	Mitochondrial peptide methionine sulfoxide reductase OS=Homo sapiens OX=9606 GN=MSRA PE=1 SV=1	42	7	7	235	26.1	8.09	1.84283e+06	2.27945e+06	1.90036e+06
Q13228	Methanethiol oxidase OS=Homo sapiens OX=9606 GN=SELENBP1 PE=1 SV=2	24	8	8	472	52.4	6.37	897023	1.23509e+06	1.09093e+06
P35754	Glutaredoxin-1 OS=Homo sapiens OX=9606 GN=GLRX PE=1 SV=2	51	5	5	106	11.8	8.09	2.68944e+06	3.54517e+06	2.83764e+06
P32119	Peroxiredoxin-2 OS=Homo sapiens OX=9606 GN=PRDX2 PE=1 SV=5	33	8	7	198	21.9	5.97	6.47154e+06	8.16954e+06	6.58276e+06
P34932	Heat shock 70 kDa protein 4 OS=Homo sapiens OX=9606 GN=HSPA4 PE=1 SV=4	10	6	6	840	94.3	5.19	1.46758e+06	2.14498e+06	1.85881e+06
P02730	Band 3 anion transport protein OS=Homo sapiens OX=9606 GN=SLC4A1 PE=1 SV=3	12	8	8	911	101.7	5.19	1.38212e+06	1.76495e+06	1.95616e+06
P07108	Acyl-CoA-binding protein OS=Homo sapiens OX=9606 GN=DBI PE=1 SV=2	64	5	5	87	10	6.57	5.9515e+06	7.69104e+06	6.06266e+06
P13727	Bone marrow proteoglycan OS=Homo sapiens OX=9606 GN=PRG2 PE=1 SV=2	35	6	6	222	25.2	6.76	1.86004e+06	2.19281e+06	2.47195e+06
Q8N6C8	Leukocyte immunoglobulin-like receptor subfamily A member 3 OS=Homo sapiens OX=9606 GN=LILRA3 PE=1 SV=3	17	5	4	439	47.4	8.09	1.41878e+06	1.75738e+06	1.59933e+06
Q13303	Voltage-gated potassium channel subunit beta-2 OS=Homo sapiens OX=9606 GN=KCNAB2 PE=1 SV=2	28	7	5	367	41	9	1.06585e+06	1.57763e+06	1.12099e+06
P24158	Myeloblastin OS=Homo sapiens OX=9606 GN=PRTN3 PE=1 SV=3	28	4	4	256	27.8	8.35	7.36796e+06	1.57181e+07	1.27271e+07
P62328	Thymosin beta-4 OS=Homo sapiens OX=9606 GN=TMSB4X PE=1 SV=2	30	2	2	44	5.1	5.06	2.78761e+08	3.32964e+08	2.43247e+08
P59665	Neutrophil defensin 1 OS=Homo sapiens OX=9606 GN=DEFA1 PE=1 SV=1	27	5	5	94	10.2	6.99	8.92046e+08	1.06814e+09	8.40525e+08
P01859	Immunoglobulin heavy constant gamma 2 OS=Homo sapiens OX=9606 GN=IGHG2 PE=1 SV=2	27	7	2	326	35.9	7.59	492137	648888	586063
P67936	Tropomyosin alpha-4 chain OS=Homo sapiens OX=9606 GN=TPM4 PE=1 SV=3	21	5	3	248	28.5	4.69	988298	1.06954e+06	925660
Q15942	Zyxin OS=Homo sapiens OX=9606 GN=ZYX PE=1 SV=1	14	5	5	572	61.2	6.67	1.03941e+07	1.23297e+07	1.18404e+07
P20810	Calpastatin OS=Homo sapiens OX=9606 GN=CAST PE=1 SV=4	14	7	7	708	76.5	5.07	1.7132e+06	3.78428e+06	2.88931e+06
P10124	Serglycin OS=Homo sapiens OX=9606 GN=SRGN PE=1 SV=3	32	4	4	158	17.6	4.96	2.86101e+06	3.37501e+06	2.81732e+06
Q10567	AP-1 complex subunit beta-1 OS=Homo sapiens OX=9606 GN=AP1B1 PE=1 SV=2	8	7	7	949	104.6	5.06	1.53158e+06	1.89943e+06	1.55269e+06
P09417	Dihydropteridine reductase OS=Homo sapiens OX=9606 GN=QDPR PE=1 SV=2	38	6	6	244	25.8	7.37	1.04205e+06	1.55029e+06	1.26504e+06
Q6JBY9	CapZ-interacting protein OS=Homo sapiens OX=9606 GN=RCSD1 PE=1 SV=1	17	4	4	416	44.5	5.4	1.78128e+06	2.20346e+06	2.17388e+06
Q01469	Fatty acid-binding protein 5 OS=Homo sapiens OX=9606 GN=FABP5 PE=1 SV=3	48	6	6	135	15.2	7.01	1.85547e+06	2.50106e+06	1.74758e+06
P01008	Antithrombin-III OS=Homo sapiens OX=9606 GN=SERPINC1 PE=1 SV=1	17	5	5	464	52.6	6.71	1.245e+06	1.62147e+06	1.11887e+06
P23526	Adenosylhomocysteinase OS=Homo sapiens OX=9606 GN=AHCY PE=1 SV=4	19	7	7	432	47.7	6.34	1.24591e+06	1.68051e+06	1.44904e+06
P62318	Small nuclear ribonucleoprotein Sm D3 OS=Homo sapiens OX=9606 GN=SNRPD3 PE=1 SV=1	48	4	4	126	13.9	10.32	3.10241e+06	3.43508e+06	3.09381e+06
P06753	Tropomyosin alpha-3 chain OS=Homo sapiens OX=9606 GN=TPM3 PE=1 SV=2	19	5	3	285	32.9	4.72	1.15304e+06	1.29605e+06	1.26609e+06
P00746	Complement factor D OS=Homo sapiens OX=9606 GN=CFD PE=1 SV=5	31	4	4	253	27	7.71	1.46521e+06	1.77549e+06	1.46379e+06
Q06830	Peroxiredoxin-1 OS=Homo sapiens OX=9606 GN=PRDX1 PE=1 SV=1	40	8	7	199	22.1	8.13	1.52551e+06	2.38367e+06	1.42335e+06
P61978	Heterogeneous nuclear ribonucleoprotein K OS=Homo sapiens OX=9606 GN=HNRNPK PE=1 SV=1	17	6	6	463	50.9	5.54	7.57452e+06	7.98398e+06	7.236e+06
P54819	Adenylate kinase 2, mitochondrial OS=Homo sapiens OX=9606 GN=AK2 PE=1 SV=2	33	7	7	239	26.5	7.81	3.76599e+06	1.48963e+06	1.02362e+06
P61916	NPC intracellular cholesterol transporter 2 OS=Homo sapiens OX=9606 GN=NPC2 PE=1 SV=1	43	5	5	151	16.6	7.65	4.47082e+06	5.29573e+06	4.64518e+06
Q01459	Di-N-acetylchitobiase OS=Homo sapiens OX=9606 GN=CTBS PE=1 SV=1	17	5	5	385	43.7	6.64	1.06104e+06	1.51546e+06	1.13871e+06
Q9H0U4	Ras-related protein Rab-1B OS=Homo sapiens OX=9606 GN=RAB1B PE=1 SV=1	23	4	2	201	22.2	5.73	2.72225e+06	4550701	3.60314e+06	Acetyl [N-Term]
Q92688	Acidic leucine-rich nuclear phosphoprotein 32 family member B OS=Homo sapiens OX=9606 GN=ANP32B PE=1 SV=1	22	7	3	251	28.8	4.06	560362	414874	450953
P17213	Bactericidal permeability-increasing protein OS=Homo sapiens OX=9606 GN=BPI PE=1 SV=4	16	7	7	487	53.9	9.38	3.13896e+06	4.54836e+06	3.81372e+06
P68036	Ubiquitin-conjugating enzyme E2 L3 OS=Homo sapiens OX=9606 GN=UBE2L3 PE=1 SV=1	42	4	4	154	17.9	8.51	1.5441e+06	1.89805e+06	1.67057e+06
Q16777	Histone H2A type 2-C OS=Homo sapiens OX=9606 GN=H2AC20 PE=1 SV=4	36	4	2	129	14	10.9	1.13484e+06	956644	815859
Q32MZ4	Leucine-rich repeat flightless-interacting protein 1 OS=Homo sapiens OX=9606 GN=LRRFIP1 PE=1 SV=2	8	5	5	808	89.2	4.65	1.2718e+06	1.33315e+06	1.13767e+06
Q9Y2W1	Thyroid hormone receptor-associated protein 3 OS=Homo sapiens OX=9606 GN=THRAP3 PE=1 SV=2	5	5	5	955	108.6	10.15	889022	990853	1.63693e+06
P01033	Metalloproteinase inhibitor 1 OS=Homo sapiens OX=9606 GN=TIMP1 PE=1 SV=1	38	5	5	207	23.2	8.1	1.43227e+06	1.81176e+06	1.58184e+06
P19878	Neutrophil cytosol factor 2 OS=Homo sapiens OX=9606 GN=NCF2 PE=1 SV=2	12	5	5	526	59.7	6.16	5.28618e+06	5.84887e+06	5.74763e+06
P13639	Elongation factor 2 OS=Homo sapiens OX=9606 GN=EEF2 PE=1 SV=4	7	6	6	858	95.3	6.83	2.72076e+06	3.65263e+06	2.88703e+06
Q9BRA2	Thioredoxin domain-containing protein 17 OS=Homo sapiens OX=9606 GN=TXNDC17 PE=1 SV=1	38	4	4	123	13.9	5.52	1.9942e+06	2.28683e+06	2.11756e+06
P02808	Statherin OS=Homo sapiens OX=9606 GN=STATH PE=1 SV=2	55	2	2	62	7.3	8.47	243195	1.04075e+07	4.01944e+06
Q04721	Neurogenic locus notch homolog protein 2 OS=Homo sapiens OX=9606 GN=NOTCH2 PE=1 SV=3	3	5	5	2471	265.2	5.14	782450	847225	803399
Q9H0R4	Haloacid dehalogenase-like hydrolase domain-containing protein 2 OS=Homo sapiens OX=9606 GN=HDHD2 PE=1 SV=1	37	5	5	259	28.5	6.24	1.56566e+06	2.59937e+06	2.63638e+06
P26022	Pentraxin-related protein PTX3 OS=Homo sapiens OX=9606 GN=PTX3 PE=1 SV=3	17	4	4	381	41.9	5.01	1.1026e+06	1.58546e+06	1.53264e+06
P63279	SUMO-conjugating enzyme UBC9 OS=Homo sapiens OX=9606 GN=UBE2I PE=1 SV=1	23	5	5	158	18	8.66	2.5274e+06	3.04897e+06	2.53242e+06
P01889	HLA class I histocompatibility antigen, B alpha chain OS=Homo sapiens OX=9606 GN=HLA-B PE=1 SV=3	15	4	2	362	40.4	5.85	1.11534e+06	1.8157e+06	1.92519e+06
P08236	Beta-glucuronidase OS=Homo sapiens OX=9606 GN=GUSB PE=1 SV=2	11	4	4	651	74.7	7.02	647579	915573	799103
P00751	Complement factor B OS=Homo sapiens OX=9606 GN=CFB PE=1 SV=2	11	6	6	764	85.5	7.06	3.44018e+06	4.51404e+06	3.51932e+06
P23528	Cofilin-1 OS=Homo sapiens OX=9606 GN=CFL1 PE=1 SV=3	18	4	4	166	18.5	8.09	2.114e+06	3.18295e+06	3.04078e+06
O75390	Citrate synthase, mitochondrial OS=Homo sapiens OX=9606 GN=CS PE=1 SV=2	14	6	6	466	51.7	8.32	1.329e+06	1.53036e+06	1.40199e+06
Q9NQR4	Omega-amidase NIT2 OS=Homo sapiens OX=9606 GN=NIT2 PE=1 SV=1	37	7	7	276	30.6	7.21	892237	778066	1.05488e+06
Q99436	Proteasome subunit beta type-7 OS=Homo sapiens OX=9606 GN=PSMB7 PE=1 SV=1	20	6	6	277	29.9	7.68	2.96956e+06	3.48807e+06	2.97457e+06
P16035	Metalloproteinase inhibitor 2 OS=Homo sapiens OX=9606 GN=TIMP2 PE=1 SV=2	26	5	5	220	24.4	7.49	1.56667e+06	2.02262e+06	1.55746e+06
P16949	Stathmin OS=Homo sapiens OX=9606 GN=STMN1 PE=1 SV=3	22	4	4	149	17.3	5.97	4.49414e+06	4.18592e+06	4.34834e+06
O75223	Gamma-glutamylcyclotransferase OS=Homo sapiens OX=9606 GN=GGCT PE=1 SV=1	29	5	5	188	21	5.14	1.59743e+06	1.92661e+06	1.81184e+06
Q96C86	m7GpppX diphosphatase OS=Homo sapiens OX=9606 GN=DCPS PE=1 SV=2	23	5	5	337	38.6	6.38	468948	675953	712452
P53621	Coatomer subunit alpha OS=Homo sapiens OX=9606 GN=COPA PE=1 SV=2	5	4	4	1224	138.3	7.66	4.73381e+06	5.67897e+06	4.72288e+06
P14314	Glucosidase 2 subunit beta OS=Homo sapiens OX=9606 GN=PRKCSH PE=1 SV=2	15	4	4	528	59.4	4.41	1.15877e+06	1.57234e+06	1.37537e+06
P36871	Phosphoglucomutase-1 OS=Homo sapiens OX=9606 GN=PGM1 PE=1 SV=3	9	4	4	562	61.4	6.76	1.39068e+06	1.91119e+06	1.66931e+06
Q13510	Acid ceramidase OS=Homo sapiens OX=9606 GN=ASAH1 PE=1 SV=5	16	5	5	395	44.6	7.62	1.60211e+06	1.49493e+06	1.21558e+06
Q15019	Septin-2 OS=Homo sapiens OX=9606 GN=SEPTIN2 PE=1 SV=1	20	6	6	361	41.5	6.6	795459	869345	1238779
Q99497	Parkinson disease protein 7 OS=Homo sapiens OX=9606 GN=PARK7 PE=1 SV=2	13	3	3	189	19.9	6.79	4.97336e+06	5.29949e+06	4.70351e+06
P26639	Threonine--tRNA ligase 1, cytoplasmic OS=Homo sapiens OX=9606 GN=TARS1 PE=1 SV=3	8	5	5	723	83.4	6.67	823946	951745	1.06919e+06
Q7Z794	Keratin, type II cytoskeletal 1b OS=Homo sapiens OX=9606 GN=KRT77 PE=1 SV=3	7	5	2	578	61.9	5.99	55389.6	310212	46089.6
Q15149	Plectin OS=Homo sapiens OX=9606 GN=PLEC PE=1 SV=3	2	6	6	4684	531.5	5.96	871557	878518	780373
Q03405	Urokinase plasminogen activator surface receptor OS=Homo sapiens OX=9606 GN=PLAUR PE=1 SV=1	15	4	4	335	37	6.65	2.61161e+06	3.03031e+06	2.87648e+06
Q9BS26	Endoplasmic reticulum resident protein 44 OS=Homo sapiens OX=9606 GN=ERP44 PE=1 SV=1	15	5	4	406	46.9	5.26	606235	785435	805420
P02749	Beta-2-glycoprotein 1 OS=Homo sapiens OX=9606 GN=APOH PE=1 SV=3	16	4	4	345	38.3	7.97	821203	1.07315e+06	1.09981e+06
P30046	D-dopachrome decarboxylase OS=Homo sapiens OX=9606 GN=DDT PE=1 SV=3	32	3	3	118	12.7	7.3	3.56065e+06	4.33e+06	3.59635e+06
O95989	Diphosphoinositol polyphosphate phosphohydrolase 1 OS=Homo sapiens OX=9606 GN=NUDT3 PE=1 SV=1	33	5	5	172	19.5	6.34	1.15948e+06	1.61898e+06	1.18892e+06
Q15257	Serine/threonine-protein phosphatase 2A activator OS=Homo sapiens OX=9606 GN=PTPA PE=1 SV=3	22	5	5	358	40.6	5.94	630845	1.11017e+06	834455
P78380	Oxidized low-density lipoprotein receptor 1 OS=Homo sapiens OX=9606 GN=OLR1 PE=1 SV=1	21	4	4	273	30.9	7.28	745764	1.57184e+06	859473
P31946	14-3-3 protein beta/alpha OS=Homo sapiens OX=9606 GN=YWHAB PE=1 SV=3	18	4	2	246	28.1	4.83	2.90573e+06	3.78481e+06	3.36715e+06
Q96C23	Galactose mutarotase OS=Homo sapiens OX=9606 GN=GALM PE=1 SV=1	20	5	5	342	37.7	6.65	790232	1.06398e+06	864750
P04632	Calpain small subunit 1 OS=Homo sapiens OX=9606 GN=CAPNS1 PE=1 SV=1	22	4	4	268	28.3	5.2	2.50088e+06	3.3367e+06	2.74353e+06
P34059	N-acetylgalactosamine-6-sulfatase OS=Homo sapiens OX=9606 GN=GALNS PE=1 SV=1	13	5	5	522	58	6.74	529412	936924	829882
Q14103	Heterogeneous nuclear ribonucleoprotein D0 OS=Homo sapiens OX=9606 GN=HNRNPD PE=1 SV=1	14	5	5	355	38.4	7.81	2.23501e+06	2.83402e+06	2.26453e+06
Q8N423	Leukocyte immunoglobulin-like receptor subfamily B member 2 OS=Homo sapiens OX=9606 GN=LILRB2 PE=1 SV=4	8	3	2	598	65	7.23	602436	1.00316e+06	736371
P61981	14-3-3 protein gamma OS=Homo sapiens OX=9606 GN=YWHAG PE=1 SV=2	17	4	2	247	28.3	4.89	1.1165e+06	990260	828366
P14174	Macrophage migration inhibitory factor OS=Homo sapiens OX=9606 GN=MIF PE=1 SV=4	34	3	3	115	12.5	7.88	8.90784e+06	9506985	9.78284e+06
Q14314	Fibroleukin OS=Homo sapiens OX=9606 GN=FGL2 PE=1 SV=1	16	7	7	439	50.2	7.39	2.80097e+06	3.29398e+06	2.74786e+06
P07237	Protein disulfide-isomerase OS=Homo sapiens OX=9606 GN=P4HB PE=1 SV=3	11	5	5	508	57.1	4.87	1374538	1.7164e+06	1.54916e+06
P62316	Small nuclear ribonucleoprotein Sm D2 OS=Homo sapiens OX=9606 GN=SNRPD2 PE=1 SV=1	31	4	4	118	13.5	9.91	3.40746e+06	3.56352e+06	2.46912e+06
Q04760	Lactoylglutathione lyase OS=Homo sapiens OX=9606 GN=GLO1 PE=1 SV=4	32	5	5	184	20.8	5.31	1.29381e+06	1.79985e+06	1.35606e+06
Q8WUM4	Programmed cell death 6-interacting protein OS=Homo sapiens OX=9606 GN=PDCD6IP PE=1 SV=1	6	6	6	868	96	6.52	2.49576e+06	2.66031e+06	2.42425e+06
P02647	Apolipoprotein A-I OS=Homo sapiens OX=9606 GN=APOA1 PE=1 SV=1	21	5	5	267	30.8	5.76	1.0116e+06	1.26768e+06	1.09676e+06
P61026	Ras-related protein Rab-10 OS=Homo sapiens OX=9606 GN=RAB10 PE=1 SV=1	23	4	2	200	22.5	8.38	746958	874561	795339
Q16181	Septin-7 OS=Homo sapiens OX=9606 GN=SEPTIN7 PE=1 SV=2	12	5	4	437	50.6	8.63	1.23135e+06	1.26949e+06	1.23417e+06
P07686	Beta-hexosaminidase subunit beta OS=Homo sapiens OX=9606 GN=HEXB PE=1 SV=3	11	4	4	556	63.1	6.76	635058	902446	809623
Q96CX2	BTB/POZ domain-containing protein KCTD12 OS=Homo sapiens OX=9606 GN=KCTD12 PE=1 SV=1	16	5	5	325	35.7	5.64	706262	1.02055e+06	982937
O15143	Actin-related protein 2/3 complex subunit 1B OS=Homo sapiens OX=9606 GN=ARPC1B PE=1 SV=3	10	3	3	372	40.9	8.35	3.19451e+06	3.16306e+06	2.92769e+06
Q12907	Vesicular integral-membrane protein VIP36 OS=Homo sapiens OX=9606 GN=LMAN2 PE=1 SV=1	15	4	4	356	40.2	6.95	841876	1.14214e+06	1.04757e+06
Q16851	UTP--glucose-1-phosphate uridylyltransferase OS=Homo sapiens OX=9606 GN=UGP2 PE=1 SV=5	9	4	4	508	56.9	8.15	1.49772e+06	1.94205e+06	1.76155e+06
Q9H098	Protein FAM107B OS=Homo sapiens OX=9606 GN=FAM107B PE=1 SV=1	15	4	4	131	15.5	8.29	2.13329e+06	2.19878e+06	2.13276e+06
Q86Y46	Keratin, type II cytoskeletal 73 OS=Homo sapiens OX=9606 GN=KRT73 PE=1 SV=1	11	6	2	540	58.9	7.23		335720	127669
P16070	CD44 antigen OS=Homo sapiens OX=9606 GN=CD44 PE=1 SV=3	4	3	3	742	81.5	5.33	6.24067e+06	8.69611e+06	8.05187e+06
P14317	Hematopoietic lineage cell-specific protein OS=Homo sapiens OX=9606 GN=HCLS1 PE=1 SV=3	6	5	5	486	54	4.81	1.68586e+06	1.59636e+06	1.2806e+06
Q9H3S1	Semaphorin-4A OS=Homo sapiens OX=9606 GN=SEMA4A PE=1 SV=2	9	5	5	761	83.5	6.84	1.68317e+06	2.09852e+06	1.95814e+06
P05114	Non-histone chromosomal protein HMG-14 OS=Homo sapiens OX=9606 GN=HMGN1 PE=1 SV=3	27	3	3	100	10.7	9.6	5.4651e+06	6.34016e+06	5.06223e+06
O75436	Vacuolar protein sorting-associated protein 26A OS=Homo sapiens OX=9606 GN=VPS26A PE=1 SV=2	21	5	5	327	38.1	6.57	2.1232e+06	2.18468e+06	2.02439e+06
Q9GZP4	PITH domain-containing protein 1 OS=Homo sapiens OX=9606 GN=PITHD1 PE=1 SV=1	32	5	5	211	24.2	5.74	785649	1.41865e+06	1.08596e+06
Q9H4M9	EH domain-containing protein 1 OS=Homo sapiens OX=9606 GN=EHD1 PE=1 SV=2	10	4	4	534	60.6	6.83	1.33079e+06	1.78987e+06	1.49655e+06
P62314	Small nuclear ribonucleoprotein Sm D1 OS=Homo sapiens OX=9606 GN=SNRPD1 PE=1 SV=1	55	4	4	119	13.3	11.56	1.18411e+06	1.85007e+06	1.6785e+06
O43493	Trans-Golgi network integral membrane protein 2 OS=Homo sapiens OX=9606 GN=TGOLN2 PE=1 SV=4	11	3	3	437	45.9	5.63	537829	641569	614155
Q9NPY3	Complement component C1q receptor OS=Homo sapiens OX=9606 GN=CD93 PE=1 SV=3	8	4	4	652	68.5	5.44	1.245e+06	1.3837e+06	1.13886e+06
P02790	Hemopexin OS=Homo sapiens OX=9606 GN=HPX PE=1 SV=2	16	4	4	462	51.6	7.02	520806	913146	813844
Q02750	Dual specificity mitogen-activated protein kinase kinase 1 OS=Homo sapiens OX=9606 GN=MAP2K1 PE=1 SV=2	3	3	3	393	43.4	6.62	584712	921290	999499
Q86YZ3	Hornerin OS=Homo sapiens OX=9606 GN=HRNR PE=1 SV=2	6	4	4	2850	282.2	10.04	593506	1.31269e+06	637968
Q969H8	Myeloid-derived growth factor OS=Homo sapiens OX=9606 GN=MYDGF PE=1 SV=1	21	3	3	173	18.8	6.68	1.2544e+06	1.57484e+06	1.33579e+06
Q5QGZ9	C-type lectin domain family 12 member A OS=Homo sapiens OX=9606 GN=CLEC12A PE=1 SV=3	15	3	3	265	30.7	8.6	696178	865252	713693
P09525	Annexin A4 OS=Homo sapiens OX=9606 GN=ANXA4 PE=1 SV=4	16	4	4	319	35.9	6.13	514809	696722	833195
O75531	Barrier-to-autointegration factor OS=Homo sapiens OX=9606 GN=BANF1 PE=1 SV=1	40	2	2	89	10.1	6.09	427706	647817	436893
Q05315	Galectin-10 OS=Homo sapiens OX=9606 GN=CLC PE=1 SV=3	21	4	4	142	16.4	7.37	2.86822e+07	3.21032e+07	2.75114e+07
P14625	Endoplasmin OS=Homo sapiens OX=9606 GN=HSP90B1 PE=1 SV=1	6	4	4	803	92.4	4.84	612640	461066	2.09646e+06
P31948	Stress-induced-phosphoprotein 1 OS=Homo sapiens OX=9606 GN=STIP1 PE=1 SV=1	10	5	5	543	62.6	6.8	1.6607e+06	2.29343e+06	1.96814e+06
Q7Z5R6	Amyloid beta A4 precursor protein-binding family B member 1-interacting protein OS=Homo sapiens OX=9606 GN=APBB1IP PE=1 SV=1	8	4	4	666	73.1	5.59	515617	611051	570316
P50570	Dynamin-2 OS=Homo sapiens OX=9606 GN=DNM2 PE=1 SV=2	6	4	4	870	98	7.44	514855	885566	617937
P28074	Proteasome subunit beta type-5 OS=Homo sapiens OX=9606 GN=PSMB5 PE=1 SV=3	14	3	3	263	28.5	6.92	424623	505901	289426
O95544	NAD kinase OS=Homo sapiens OX=9606 GN=NADK PE=1 SV=1	12	4	4	446	49.2	6.47	820157	943737	508844	Acetyl [N-Term]
P00505	Aspartate aminotransferase, mitochondrial OS=Homo sapiens OX=9606 GN=GOT2 PE=1 SV=3	11	4	4	430	47.5	9.01	439707	534940	479035
Q9UJ70	N-acetyl-D-glucosamine kinase OS=Homo sapiens OX=9606 GN=NAGK PE=1 SV=4	15	4	4	344	37.4	6.24	706179	989161	783773
Q01844	RNA-binding protein EWS OS=Homo sapiens OX=9606 GN=EWSR1 PE=1 SV=1	7	3	3	656	68.4	9.33	826042	656593	651747
Q9NPR2	Semaphorin-4B OS=Homo sapiens OX=9606 GN=SEMA4B PE=1 SV=4	5	4	4	837	92.7	7.05	1.38331e+06	1.68655e+06	1.37148e+06
Q9NYL9	Tropomodulin-3 OS=Homo sapiens OX=9606 GN=TMOD3 PE=1 SV=1	14	4	4	352	39.6	5.19	768869	1.04196e+06	577165
Q9Y336	Sialic acid-binding Ig-like lectin 9 OS=Homo sapiens OX=9606 GN=SIGLEC9 PE=1 SV=2	6	2	2	463	50.1	7.25	979705	1.02212e+06	1.08581e+06
Q14141	Septin-6 OS=Homo sapiens OX=9606 GN=SEPTIN6 PE=1 SV=4	9	4	3	434	49.7	6.67	801407	858417	732467
O00241	Signal-regulatory protein beta-1 OS=Homo sapiens OX=9606 GN=SIRPB1 PE=1 SV=5	11	3	2	398	43.2	6.52	111758	147849	136209
P11277	Spectrin beta chain, erythrocytic OS=Homo sapiens OX=9606 GN=SPTB PE=1 SV=5	2	4	2	2137	246.3	5.27	344657	226735	408371
P28072	Proteasome subunit beta type-6 OS=Homo sapiens OX=9606 GN=PSMB6 PE=1 SV=4	18	4	4	239	25.3	4.92	3.14604e+06	3.61018e+06	3.22264e+06
O75131	Copine-3 OS=Homo sapiens OX=9606 GN=CPNE3 PE=1 SV=1	7	4	4	537	60.1	5.85	781061	1.0222e+06	882732
P55008	Allograft inflammatory factor 1 OS=Homo sapiens OX=9606 GN=AIF1 PE=1 SV=1	29	4	4	147	16.7	6.24	1.42648e+06	1.55139e+06	1.24685e+06
P02766	Transthyretin OS=Homo sapiens OX=9606 GN=TTR PE=1 SV=1	25	3	3	147	15.9	5.76	422919	497260	472785
P84243	Histone H3.3 OS=Homo sapiens OX=9606 GN=H3-3A PE=1 SV=2	15	3	2	136	15.3	11.27	1.6794e+06	2.11788e+06	1.99493e+06
P14678	Small nuclear ribonucleoprotein-associated proteins B and B' OS=Homo sapiens OX=9606 GN=SNRPB PE=1 SV=2	15	5	5	240	24.6	11.19	1.88956e+06	2.3503e+06	2.00637e+06
P53999	Activated RNA polymerase II transcriptional coactivator p15 OS=Homo sapiens OX=9606 GN=SUB1 PE=1 SV=3	37	4	4	127	14.4	9.6	904191	1.06043e+06	822698
Q71U36	Tubulin alpha-1A chain OS=Homo sapiens OX=9606 GN=TUBA1A PE=1 SV=1	12	5	5	451	50.1	5.06	1.15444e+06	1.26625e+06	940324
Q9UKK9	ADP-sugar pyrophosphatase OS=Homo sapiens OX=9606 GN=NUDT5 PE=1 SV=1	18	3	3	219	24.3	4.94	482660	477724	501915
O14974	Protein phosphatase 1 regulatory subunit 12A OS=Homo sapiens OX=9606 GN=PPP1R12A PE=1 SV=1	4	4	4	1030	115.2	5.4	626799	847359	911210
P07355	Annexin A2 OS=Homo sapiens OX=9606 GN=ANXA2 PE=1 SV=2	10	3	3	339	38.6	7.75	347667	444506	429340
Q9Y624	Junctional adhesion molecule A OS=Homo sapiens OX=9606 GN=F11R PE=1 SV=1	10	3	3	299	32.6	7.9	1.59438e+06	1.98429e+06	1.62984e+06
Q86UX7	Fermitin family homolog 3 OS=Homo sapiens OX=9606 GN=FERMT3 PE=1 SV=1	7	4	4	667	75.9	6.98	2.59256e+06	3.09993e+06	2.31338e+06
P06865	Beta-hexosaminidase subunit alpha OS=Homo sapiens OX=9606 GN=HEXA PE=1 SV=2	6	3	3	529	60.7	5.16	356243	501377	408338
P32942	Intercellular adhesion molecule 3 OS=Homo sapiens OX=9606 GN=ICAM3 PE=1 SV=2	6	4	4	547	59.5	5.43	1.33197e+07	1.63394e+07	1.59893e+07
Q9H4G4	Golgi-associated plant pathogenesis-related protein 1 OS=Homo sapiens OX=9606 GN=GLIPR2 PE=1 SV=3	17	2	2	154	17.2	9.41	881822	738048	808488
P13987	CD59 glycoprotein OS=Homo sapiens OX=9606 GN=CD59 PE=1 SV=1	25	3	3	128	14.2	6.48	1.46918e+06	1.79325e+06	1.58348e+06
O95777	U6 snRNA-associated Sm-like protein LSm8 OS=Homo sapiens OX=9606 GN=LSM8 PE=1 SV=3	36	3	3	96	10.4	4.48	1.19917e+06	1.53775e+06	1.53888e+06
P02549	Spectrin alpha chain, erythrocytic 1 OS=Homo sapiens OX=9606 GN=SPTA1 PE=1 SV=5	2	4	4	2419	279.8	5.05	802014	873580	762507
P06454	Prothymosin alpha OS=Homo sapiens OX=9606 GN=PTMA PE=1 SV=2	13	2	2	111	12.2	3.78	5.84576e+06	6.42745e+06	5.66575e+06
Q9H4A4	Aminopeptidase B OS=Homo sapiens OX=9606 GN=RNPEP PE=1 SV=2	7	4	4	650	72.5	5.74	711567	792457	782327
P54727	UV excision repair protein RAD23 homolog B OS=Homo sapiens OX=9606 GN=RAD23B PE=1 SV=1	7	3	3	409	43.1	4.84	1.00735e+06	1.08488e+06	1.01712e+06
O00233	26S proteasome non-ATPase regulatory subunit 9 OS=Homo sapiens OX=9606 GN=PSMD9 PE=1 SV=3	11	3	3	223	24.7	6.95	3.18708e+06	3.33944e+06	3.03203e+06
Q14739	Delta(14)-sterol reductase LBR OS=Homo sapiens OX=9606 GN=LBR PE=1 SV=2	7	4	4	615	70.7	9.36	1.72636e+06	2.5117e+06	2.16566e+06
O15511	Actin-related protein 2/3 complex subunit 5 OS=Homo sapiens OX=9606 GN=ARPC5 PE=1 SV=3	20	2	2	151	16.3	5.67	492164	603489	548897
P42768	Wiskott-Aldrich syndrome protein OS=Homo sapiens OX=9606 GN=WAS PE=1 SV=4	9	4	4	502	52.9	6.64	775398	923897	794352
Q9HB71	Calcyclin-binding protein OS=Homo sapiens OX=9606 GN=CACYBP PE=1 SV=2	16	4	4	228	26.2	8.25	629780	821771	698702
Q53FA7	Quinone oxidoreductase PIG3 OS=Homo sapiens OX=9606 GN=TP53I3 PE=1 SV=2	11	3	3	332	35.5	7.17	926811	1.092e+06	1.02727e+06
P00734	Prothrombin OS=Homo sapiens OX=9606 GN=F2 PE=1 SV=2	5	2	2	622	70	5.9	951673	1.15326e+06	1.01964e+06
Q1KMD3	Heterogeneous nuclear ribonucleoprotein U-like protein 2 OS=Homo sapiens OX=9606 GN=HNRNPUL2 PE=1 SV=1	5	3	3	747	85.1	4.91	650572	779665	714596
Q13185	Chromobox protein homolog 3 OS=Homo sapiens OX=9606 GN=CBX3 PE=1 SV=4	14	3	3	183	20.8	5.33	835341	800817	612251
O15400	Syntaxin-7 OS=Homo sapiens OX=9606 GN=STX7 PE=1 SV=4	13	3	3	261	29.8	5.55	700870	811790	399254
P07311	Acylphosphatase-1 OS=Homo sapiens OX=9606 GN=ACYP1 PE=1 SV=2	32	3	3	99	11.3	9.31	693687	835902	784272
P10155	60 kDa SS-A/Ro ribonucleoprotein OS=Homo sapiens OX=9606 GN=RO60 PE=1 SV=2	7	3	3	538	60.6	8.03	283253	445685	290755
Q9Y2S6	Translation machinery-associated protein 7 OS=Homo sapiens OX=9606 GN=TMA7 PE=1 SV=1	30	2	2	64	7.1	9.99	1.3536e+06	1.79939e+06	1.30665e+06
Q14847	LIM and SH3 domain protein 1 OS=Homo sapiens OX=9606 GN=LASP1 PE=1 SV=2	8	3	3	261	29.7	7.05	3.05426e+06	3.76872e+06	2.59792e+06	Acetyl [N-Term]
Q92888	Rho guanine nucleotide exchange factor 1 OS=Homo sapiens OX=9606 GN=ARHGEF1 PE=1 SV=2	4	3	3	912	102.4	5.66	1.23899e+06	1.64098e+06	2.00256e+06
Q9H1E3	Nuclear ubiquitous casein and cyclin-dependent kinase substrate 1 OS=Homo sapiens OX=9606 GN=NUCKS1 PE=1 SV=1	7	3	3	243	27.3	5.08	336738	429430	478816
Q92945	Far upstream element-binding protein 2 OS=Homo sapiens OX=9606 GN=KHSRP PE=1 SV=4	8	3	2	711	73.1	7.3	386147	459297	268253
Q01130	Serine/arginine-rich splicing factor 2 OS=Homo sapiens OX=9606 GN=SRSF2 PE=1 SV=4	14	3	3	221	25.5	11.85	1.79895e+06	2.24314e+06	2.09178e+06
P29966	Myristoylated alanine-rich C-kinase substrate OS=Homo sapiens OX=9606 GN=MARCKS PE=1 SV=4	10	2	2	332	31.5	4.45	1.0308e+06	1.22964e+06	1.10751e+06
P30047	GTP cyclohydrolase 1 feedback regulatory protein OS=Homo sapiens OX=9606 GN=GCHFR PE=1 SV=3	40	2	2	84	9.7	6.54	242094	347171	349700
P02776	Platelet factor 4 OS=Homo sapiens OX=9606 GN=PF4 PE=1 SV=2	12	2	2	101	10.8	8.62	1.18597e+06	1657339	990487
P62269	40S ribosomal protein S18 OS=Homo sapiens OX=9606 GN=RPS18 PE=1 SV=3	13	3	3	152	17.7	10.99	713366	999647	921283
Q16543	Hsp90 co-chaperone Cdc37 OS=Homo sapiens OX=9606 GN=CDC37 PE=1 SV=1	10	3	3	378	44.4	5.25	564906	763764	706154
Q99439	Calponin-2 OS=Homo sapiens OX=9606 GN=CNN2 PE=1 SV=4	13	4	4	309	33.7	7.33	2.39949e+06	3.82619e+06	1.77304e+06
P52888	Thimet oligopeptidase OS=Homo sapiens OX=9606 GN=THOP1 PE=1 SV=2	6	4	4	689	78.8	6.05	358950	437454	238867
P09486	SPARC OS=Homo sapiens OX=9606 GN=SPARC PE=1 SV=1	14	4	4	303	34.6	4.84	691954	914329	731101
P31943	Heterogeneous nuclear ribonucleoprotein H OS=Homo sapiens OX=9606 GN=HNRNPH1 PE=1 SV=4	8	3	3	449	49.2	6.3	385249	418816	389348
P62308	Small nuclear ribonucleoprotein G OS=Homo sapiens OX=9606 GN=SNRPG PE=1 SV=1	17	2	2	76	8.5	8.88	350516	549822	283564
Q99536	Synaptic vesicle membrane protein VAT-1 homolog OS=Homo sapiens OX=9606 GN=VAT1 PE=1 SV=2	5	3	3	393	41.9	6.29	1.21229e+06	1.52337e+06	1.25371e+06
P19338	Nucleolin OS=Homo sapiens OX=9606 GN=NCL PE=1 SV=3	5	3	3	710	76.6	4.7	347861	369161	356360
Q13492	Phosphatidylinositol-binding clathrin assembly protein OS=Homo sapiens OX=9606 GN=PICALM PE=1 SV=2	3	3	3	652	70.7	7.9	387087	490291	362441
P55786	Puromycin-sensitive aminopeptidase OS=Homo sapiens OX=9606 GN=NPEPPS PE=1 SV=2	4	3	3	919	103.2	5.72	219176	332760	47775.7
P02765	Alpha-2-HS-glycoprotein OS=Homo sapiens OX=9606 GN=AHSG PE=1 SV=2	8	3	3	367	39.3	5.72	3.20902e+06	3.59761e+06	3.06396e+06
P04275	von Willebrand factor OS=Homo sapiens OX=9606 GN=VWF PE=1 SV=4	1	3	3	2813	309.1	5.48	295384	277925	266698
P00492	Hypoxanthine-guanine phosphoribosyltransferase OS=Homo sapiens OX=9606 GN=HPRT1 PE=1 SV=2	11	2	2	218	24.6	6.68	664696	691842	562997
P10599	Thioredoxin OS=Homo sapiens OX=9606 GN=TXN PE=1 SV=3	24	2	2	105	11.7	4.92	753057	1.52384e+06	1.2515e+06
Q93033	Immunoglobulin superfamily member 2 OS=Homo sapiens OX=9606 GN=CD101 PE=1 SV=2	4	4	4	1021	115	6.96	1.12869e+06	1.24649e+06	1.06874e+06
Q13201	Multimerin-1 OS=Homo sapiens OX=9606 GN=MMRN1 PE=1 SV=3	2	2	2	1228	138	7.93	1.04163e+06	935922	866183
Q9BUH6	Protein PAXX OS=Homo sapiens OX=9606 GN=PAXX PE=1 SV=2	14	3	3	204	21.6	5.48	838622	981091	910617
Q08209	Serine/threonine-protein phosphatase 2B catalytic subunit alpha isoform OS=Homo sapiens OX=9606 GN=PPP3CA PE=1 SV=1	6	3	3	521	58.7	5.86	460685	491173	154234
P81605	Dermcidin OS=Homo sapiens OX=9606 GN=DCD PE=1 SV=2	23	2	2	110	11.3	6.54	2.23933e+06	3.40919e+06	2.22295e+06
Q13404	Ubiquitin-conjugating enzyme E2 variant 1 OS=Homo sapiens OX=9606 GN=UBE2V1 PE=1 SV=2	20	3	3	147	16.5	7.93	5.04427e+06	5.59408e+06	5.22309e+06
P55145	Mesencephalic astrocyte-derived neurotrophic factor OS=Homo sapiens OX=9606 GN=MANF PE=1 SV=3	13	2	2	182	20.7	8.69	316206	391724	361960
P22748	Carbonic anhydrase 4 OS=Homo sapiens OX=9606 GN=CA4 PE=1 SV=2	12	3	3	312	35	7.83	563919	621172	611423
P61604	10 kDa heat shock protein, mitochondrial OS=Homo sapiens OX=9606 GN=HSPE1 PE=1 SV=2	25	2	2	102	10.9	8.92	334401	342736	364830
Q9H0B8	Cysteine-rich secretory protein LCCL domain-containing 2 OS=Homo sapiens OX=9606 GN=CRISPLD2 PE=2 SV=1	7	3	3	497	55.9	8.02	723633	939089	712509
Q08ET2	Sialic acid-binding Ig-like lectin 14 OS=Homo sapiens OX=9606 GN=SIGLEC14 PE=1 SV=1	18	3	3	396	43.9	7.96	157833
O14579	Coatomer subunit epsilon OS=Homo sapiens OX=9606 GN=COPE PE=1 SV=3	13	3	3	308	34.5	5.12	261429	521787	414375
Q9UBR2	Cathepsin Z OS=Homo sapiens OX=9606 GN=CTSZ PE=1 SV=1	9	2	2	303	33.8	7.11	308766	327474	454710
Q07812	Apoptosis regulator BAX OS=Homo sapiens OX=9606 GN=BAX PE=1 SV=1	11	2	2	192	21.2	5.22	346090	410199	309667	Acetyl [N-Term]
Q14683	Structural maintenance of chromosomes protein 1A OS=Homo sapiens OX=9606 GN=SMC1A PE=1 SV=2	2	2	2	1233	143.1	7.64	263681	373620	391196
Q14764	Major vault protein OS=Homo sapiens OX=9606 GN=MVP PE=1 SV=4	3	3	3	893	99.3	5.48	1.70228e+06	1.74943e+06	1.58235e+06
Q9NTM9	Copper homeostasis protein cutC homolog OS=Homo sapiens OX=9606 GN=CUTC PE=1 SV=1	10	2	2	273	29.3	8.18	351561	455563	387919
O94760	N(G),N(G)-dimethylarginine dimethylaminohydrolase 1 OS=Homo sapiens OX=9606 GN=DDAH1 PE=1 SV=3	11	3	2	285	31.1	5.81	366873	453122	425342
P16284	Platelet endothelial cell adhesion molecule OS=Homo sapiens OX=9606 GN=PECAM1 PE=1 SV=2	3	2	2	738	82.5	6.99	3.87449e+06	4.70076e+06	4.08126e+06
Q9P0L0	Vesicle-associated membrane protein-associated protein A OS=Homo sapiens OX=9606 GN=VAPA PE=1 SV=3	10	2	2	249	27.9	8.62	824216	855069	612659
P58546	Myotrophin OS=Homo sapiens OX=9606 GN=MTPN PE=1 SV=2	32	2	2	118	12.9	5.52	417892	635070	376415
P62304	Small nuclear ribonucleoprotein E OS=Homo sapiens OX=9606 GN=SNRPE PE=1 SV=1	25	2	2	92	10.8	9.44	522639	648651	500240
P52272	Heterogeneous nuclear ribonucleoprotein M OS=Homo sapiens OX=9606 GN=HNRNPM PE=1 SV=3	3	2	2	730	77.5	8.7	365943	450259	264137
A8MVU1	Putative neutrophil cytosol factor 1C OS=Homo sapiens OX=9606 GN=NCF1C PE=5 SV=1	7	2	2	366	41.8	8.84	281089	388161	284755
P07814	Bifunctional glutamate/proline--tRNA ligase OS=Homo sapiens OX=9606 GN=EPRS1 PE=1 SV=5	2	2	2	1512	170.5	7.33	318537	408616	354688
O14798	Tumor necrosis factor receptor superfamily member 10C OS=Homo sapiens OX=9606 GN=TNFRSF10C PE=1 SV=3	9	2	2	259	27.4	4.82	2.55794e+06	388907	107409
P14324	Farnesyl pyrophosphate synthase OS=Homo sapiens OX=9606 GN=FDPS PE=1 SV=4	9	3	3	419	48.2	6.15	1.05214e+06	1.08668e+06	985839
P30048	Thioredoxin-dependent peroxide reductase, mitochondrial OS=Homo sapiens OX=9606 GN=PRDX3 PE=1 SV=3	13	3	3	256	27.7	7.78	318614	465961	348547
Q13867	Bleomycin hydrolase OS=Homo sapiens OX=9606 GN=BLMH PE=1 SV=1	7	2	2	455	52.5	6.27	701249	682100	639587
Q13451	Peptidyl-prolyl cis-trans isomerase FKBP5 OS=Homo sapiens OX=9606 GN=FKBP5 PE=1 SV=2	6	2	2	457	51.2	5.9	240626	448065	380418
P01023	Alpha-2-macroglobulin OS=Homo sapiens OX=9606 GN=A2M PE=1 SV=3	3	3	3	1474	163.2	6.46	387878	474956	396545
O75688	Protein phosphatase 1B OS=Homo sapiens OX=9606 GN=PPM1B PE=1 SV=1	6	2	2	479	52.6	5.05	182298	316783	104900
Q12904	Aminoacyl tRNA synthase complex-interacting multifunctional protein 1 OS=Homo sapiens OX=9606 GN=AIMP1 PE=1 SV=2	12	2	2	312	34.3	8.43	205716	281118	237245
Q9H4E7	Differentially expressed in FDCP 6 homolog OS=Homo sapiens OX=9606 GN=DEF6 PE=1 SV=1	3	2	2	631	73.9	6.05	833383	938450	1.1202e+06
Q9HDC9	Adipocyte plasma membrane-associated protein OS=Homo sapiens OX=9606 GN=APMAP PE=1 SV=2	7	3	3	416	46.5	6.16	267514	312993	388095
P25311	Zinc-alpha-2-glycoprotein OS=Homo sapiens OX=9606 GN=AZGP1 PE=1 SV=2	10	2	2	298	34.2	6.05	188340	177356	83906.5
P04839	Cytochrome b-245 heavy chain OS=Homo sapiens OX=9606 GN=CYBB PE=1 SV=2	5	2	2	570	65.3	8.63	282381	270663	226217
Q13418	Integrin-linked protein kinase OS=Homo sapiens OX=9606 GN=ILK PE=1 SV=2	4	2	2	452	51.4	8.07	435222	505057	408618	Acetyl [N-Term]
Q8NCW5	NAD(P)H-hydrate epimerase OS=Homo sapiens OX=9606 GN=NAXE PE=1 SV=2	10	2	2	288	31.7	7.66	393487	530835	497689
P11279	Lysosome-associated membrane glycoprotein 1 OS=Homo sapiens OX=9606 GN=LAMP1 PE=1 SV=3	5	2	2	417	44.9	8.75	389663	446392	529025
Q15233	Non-POU domain-containing octamer-binding protein OS=Homo sapiens OX=9606 GN=NONO PE=1 SV=4	3	2	2	471	54.2	8.95	181921	472472	363674
P08174	Complement decay-accelerating factor OS=Homo sapiens OX=9606 GN=CD55 PE=1 SV=4	6	2	2	381	41.4	7.59	625513	879293	706343
Q15843	NEDD8 OS=Homo sapiens OX=9606 GN=NEDD8 PE=1 SV=1	28	2	2	81	9.1	8.43	448339	422908	217419
O60610	Protein diaphanous homolog 1 OS=Homo sapiens OX=9606 GN=DIAPH1 PE=1 SV=2	2	2	2	1272	141.3	5.41	614766	668837	575122
Q96EP5	DAZ-associated protein 1 OS=Homo sapiens OX=9606 GN=DAZAP1 PE=1 SV=1	6	2	2	407	43.4	8.56	432359	606288	554833
Q9UNF0	Protein kinase C and casein kinase substrate in neurons protein 2 OS=Homo sapiens OX=9606 GN=PACSIN2 PE=1 SV=2	5	2	2	486	55.7	5.2	546033	619242	510205
P30101	Protein disulfide-isomerase A3 OS=Homo sapiens OX=9606 GN=PDIA3 PE=1 SV=4	5	2	2	505	56.7	6.35	565914	773476	645904
P62306	Small nuclear ribonucleoprotein F OS=Homo sapiens OX=9606 GN=SNRPF PE=1 SV=1	23	2	2	86	9.7	4.67	618073	719828	525288
P62753	40S ribosomal protein S6 OS=Homo sapiens OX=9606 GN=RPS6 PE=1 SV=1	8	2	2	249	28.7	10.84	733374	763682	513039
P67809	Y-box-binding protein 1 OS=Homo sapiens OX=9606 GN=YBX1 PE=1 SV=3	12	2	2	324	35.9	9.88	394524	528142	487539
P62826	GTP-binding nuclear protein Ran OS=Homo sapiens OX=9606 GN=RAN PE=1 SV=3	9	2	2	216	24.4	7.49	1.51497e+06	2.2209e+06	1.33596e+06
Q13435	Splicing factor 3B subunit 2 OS=Homo sapiens OX=9606 GN=SF3B2 PE=1 SV=2	2	2	2	895	100.2	5.67	360633	455564	380526
P61160	Actin-related protein 2 OS=Homo sapiens OX=9606 GN=ACTR2 PE=1 SV=1	5	2	2	394	44.7	6.74	4.08204e+07	9.75591e+06	3.26098e+06
O15145	Actin-related protein 2/3 complex subunit 3 OS=Homo sapiens OX=9606 GN=ARPC3 PE=1 SV=3	12	2	2	178	20.5	8.59	548213	726471	591384
Q9UJU6	Drebrin-like protein OS=Homo sapiens OX=9606 GN=DBNL PE=1 SV=1	5	2	2	430	48.2	5.05	1.39787e+06	1.61025e+06	1.47269e+06
P35573	Glycogen debranching enzyme OS=Homo sapiens OX=9606 GN=AGL PE=1 SV=3	2	2	2	1532	174.7	6.76	256919	307849	105730
Q05682	Caldesmon OS=Homo sapiens OX=9606 GN=CALD1 PE=1 SV=3	3	2	2	793	93.2	5.66	515401	538680	597886
Q16775	Hydroxyacylglutathione hydrolase, mitochondrial OS=Homo sapiens OX=9606 GN=HAGH PE=1 SV=2	7	2	2	308	33.8	8.12	293222	441933	410580
Q9NQC3	Reticulon-4 OS=Homo sapiens OX=9606 GN=RTN4 PE=1 SV=2	2	2	2	1192	129.9	4.5	675281	998899	988688
P28838	Cytosol aminopeptidase OS=Homo sapiens OX=9606 GN=LAP3 PE=1 SV=3	5	2	2	519	56.1	7.93	280474	317093	314405
P09382	Galectin-1 OS=Homo sapiens OX=9606 GN=LGALS1 PE=1 SV=2	13	2	2	135	14.7	5.5	1.16279e+06	1381527	1.27798e+06
O75340	Programmed cell death protein 6 OS=Homo sapiens OX=9606 GN=PDCD6 PE=1 SV=1	13	2	2	191	21.9	5.4	242488	264180	253864
Q9NTI5	Sister chromatid cohesion protein PDS5 homolog B OS=Homo sapiens OX=9606 GN=PDS5B PE=1 SV=1	2	2	2	1447	164.6	8.47	423468	530009	458509
P63208	S-phase kinase-associated protein 1 OS=Homo sapiens OX=9606 GN=SKP1 PE=1 SV=2	12	2	2	163	18.6	4.54	258585	361962	256873
P19971	Thymidine phosphorylase OS=Homo sapiens OX=9606 GN=TYMP PE=1 SV=2	4	2	2	482	49.9	5.53	517879	574278	471346
P42167	Lamina-associated polypeptide 2, isoforms beta/gamma OS=Homo sapiens OX=9606 GN=TMPO PE=1 SV=2	5	2	2	454	50.6	9.38	609291	672884	583443
Q9NZT1	Calmodulin-like protein 5 OS=Homo sapiens OX=9606 GN=CALML5 PE=1 SV=2	21	2	2	146	15.9	4.44	991132	1.16815e+06	1.15527e+06
Q5SSJ5	Heterochromatin protein 1-binding protein 3 OS=Homo sapiens OX=9606 GN=HP1BP3 PE=1 SV=1	4	2	2	553	61.2	9.67	669850	674122	667955
Q9NPA2	Matrix metalloproteinase-25 OS=Homo sapiens OX=9606 GN=MMP25 PE=1 SV=1	3	2	2	562	62.5	8.56	653179	651565	601063
Q5JXB2	Putative ubiquitin-conjugating enzyme E2 N-like OS=Homo sapiens OX=9606 GN=UBE2NL PE=1 SV=1	14	2	2	153	17.4	5.92	590434	706735	612420
P15529	Membrane cofactor protein OS=Homo sapiens OX=9606 GN=CD46 PE=1 SV=3	6	2	2	392	43.7	6.74	187078	222015	150653
P36507	Dual specificity mitogen-activated protein kinase kinase 2 OS=Homo sapiens OX=9606 GN=MAP2K2 PE=1 SV=1	3	2	2	400	44.4	6.55	642508	745003	723912
Q9NZT2	Opioid growth factor receptor OS=Homo sapiens OX=9606 GN=OGFR PE=1 SV=3	4	2	2	677	73.3	4.84	344914	326640	108411
P02760	Protein AMBP OS=Homo sapiens OX=9606 GN=AMBP PE=1 SV=1	5	2	2	352	39	6.25	548214	621334	559802
Q04446	1,4-alpha-glucan-branching enzyme OS=Homo sapiens OX=9606 GN=GBE1 PE=1 SV=3	3	2	2	702	80.4	6.32	451001	513141	466172
P62312	U6 snRNA-associated Sm-like protein LSm6 OS=Homo sapiens OX=9606 GN=LSM6 PE=1 SV=1	23	2	2	80	9.1	9.58	600814	824795	636874
Q8NC51	Plasminogen activator inhibitor 1 RNA-binding protein OS=Homo sapiens OX=9606 GN=SERBP1 PE=1 SV=2	5	2	2	408	44.9	8.65	569879	547333	384475
O75563	Src kinase-associated phosphoprotein 2 OS=Homo sapiens OX=9606 GN=SKAP2 PE=1 SV=1	5	2	2	359	41.2	4.69	745849	743516	758839
P23246	Splicing factor, proline- and glutamine-rich OS=Homo sapiens OX=9606 GN=SFPQ PE=1 SV=2	2	2	2	707	76.1	9.44	371852	749340	447135
O43815	Striatin OS=Homo sapiens OX=9606 GN=STRN PE=1 SV=4	3	2	2	780	86.1	5.27	312834	233076	155758
P42574	Caspase-3 OS=Homo sapiens OX=9606 GN=CASP3 PE=1 SV=2	6	2	2	277	31.6	6.54	338361	421959	365802
O95166	Gamma-aminobutyric acid receptor-associated protein OS=Homo sapiens OX=9606 GN=GABARAP PE=1 SV=1	15	2	2	117	13.9	8.79	529646	737175	624911
P61964	WD repeat-containing protein 5 OS=Homo sapiens OX=9606 GN=WDR5 PE=1 SV=1	8	2	2	334	36.6	8.27	139100	190937	160830
Q9UK45	U6 snRNA-associated Sm-like protein LSm7 OS=Homo sapiens OX=9606 GN=LSM7 PE=1 SV=1	16	2	2	103	11.6	5.27	573060	579296	507102
P42677	40S ribosomal protein S27 OS=Homo sapiens OX=9606 GN=RPS27 PE=1 SV=3	23	2	2	84	9.5	9.45	621469	977852	927052
Q5D862	Filaggrin-2 OS=Homo sapiens OX=9606 GN=FLG2 PE=1 SV=1	3	2	2	2391	247.9	8.31	12005.4	376930	39518.3
P63241	Eukaryotic translation initiation factor 5A-1 OS=Homo sapiens OX=9606 GN=EIF5A PE=1 SV=2	11	2	2	154	16.8	5.24	432522	592474	622004
Q08722	Leukocyte surface antigen CD47 OS=Homo sapiens OX=9606 GN=CD47 PE=1 SV=1	5	2	2	323	35.2	7.21	271475	314980	314074
Q15691	Microtubule-associated protein RP/EB family member 1 OS=Homo sapiens OX=9606 GN=MAPRE1 PE=1 SV=3	8	2	2	268	30	5.14	314143	489016	398088
Q969E4	Transcription elongation factor A protein-like 3 OS=Homo sapiens OX=9606 GN=TCEAL3 PE=1 SV=1	17	2	2	200	22.5	4.92	211426	377941	380453
Q9P016	Thymocyte nuclear protein 1 OS=Homo sapiens OX=9606 GN=THYN1 PE=1 SV=1	8	2	2	225	25.7	9.25	218904	251852	108582
P00813	Adenosine deaminase OS=Homo sapiens OX=9606 GN=ADA PE=1 SV=3	9	2	2	363	40.7	5.95	225054	253519	292353
O75533	Splicing factor 3B subunit 1 OS=Homo sapiens OX=9606 GN=SF3B1 PE=1 SV=3	2	2	2	1304	145.7	7.09	237729	375114	410583
P22681	E3 ubiquitin-protein ligase CBL OS=Homo sapiens OX=9606 GN=CBL PE=1 SV=2	3	2	2	906	99.6	6.54	233092	250810	234903
O14745	Na(+)/H(+) exchange regulatory cofactor NHE-RF1 OS=Homo sapiens OX=9606 GN=SLC9A3R1 PE=1 SV=4	5	2	2	358	38.8	5.77	215186	270116	251225
Q92619	Rho GTPase-activating protein 45 OS=Homo sapiens OX=9606 GN=ARHGAP45 PE=1 SV=2	2	2	2	1136	124.5	6.1	366364	357912	325119
Q3LXA3	Triokinase/FMN cyclase OS=Homo sapiens OX=9606 GN=TKFC PE=1 SV=2	2	2	2	575	58.9	7.49	349745	421557	381768
Q9UQE7	Structural maintenance of chromosomes protein 3 OS=Homo sapiens OX=9606 GN=SMC3 PE=1 SV=2	2	2	2	1217	141.5	7.18	513478	136850	457674
P13807	Glycogen [starch] synthase, muscle OS=Homo sapiens OX=9606 GN=GYS1 PE=1 SV=2	2	2	2	737	83.7	6.18	303743	104648
P06703	Protein S100-A6 OS=Homo sapiens OX=9606 GN=S100A6 PE=1 SV=1	17	2	2	90	10.2	5.48	8.65123e+07	1.01695e+08	7.94064e+07
P01780	Immunoglobulin heavy variable 3-7 OS=Homo sapiens OX=9606 GN=IGHV3-7 PE=1 SV=2	17	2	2	117	12.9	6.57	102509	265956	122847
Q00610	Clathrin heavy chain 1 OS=Homo sapiens OX=9606 GN=CLTC PE=1 SV=5	1	2	2	1675	191.5	5.69	528406	604145	816128
P46109	Crk-like protein OS=Homo sapiens OX=9606 GN=CRKL PE=1 SV=1	12	2	2	303	33.8	6.74	213287	129523	162371
Q14005	Pro-interleukin-16 OS=Homo sapiens OX=9606 GN=IL16 PE=1 SV=4	2	2	2	1332	141.7	8.06	401127	1.50019e+06	269609
P07738	Bisphosphoglycerate mutase OS=Homo sapiens OX=9606 GN=BPGM PE=1 SV=2	7	2	2	259	30	6.54	241830	368727	301339
P38646	Stress-70 protein, mitochondrial OS=Homo sapiens OX=9606 GN=HSPA9 PE=1 SV=2	3	2	2	679	73.6	6.16	137431	51840.2	140696
O95466	Formin-like protein 1 OS=Homo sapiens OX=9606 GN=FMNL1 PE=1 SV=3	2	2	2	1100	121.8	5.72	333450	412746	333165
P08603	Complement factor H OS=Homo sapiens OX=9606 GN=CFH PE=1 SV=4	2	2	2	1231	139	6.61	241122	272679	231190
Q15404	Ras suppressor protein 1 OS=Homo sapiens OX=9606 GN=RSU1 PE=1 SV=3	7	2	2	277	31.5	8.65	301461	439560	289651
P52790	Hexokinase-3 OS=Homo sapiens OX=9606 GN=HK3 PE=1 SV=2	2	2	2	923	99	5.4	378046	435710	346324

## Sheet: Suppl. Table S2
Accession	Description	Coverage [%]	# Peptides	# Unique Peptides	# AAs	MW [kDa]	calc. pI	Eclipse2110_265, band A	Eclipse2110_267, band B	Eclipse2110_259, band C	Eclipse2110_261, band D	Eclipse2110_263, band E	Modifications
P13639	Elongation factor 2 OS=Homo sapiens OX=9606 GN=EEF2 PE=1 SV=4	3	1	1	858	95.3	6.83
Q13885	Tubulin beta-2A chain OS=Homo sapiens OX=9606 GN=TUBB2A PE=1 SV=1	6	1	1	445	49.9	4.89
P22314	Ubiquitin-like modifier-activating enzyme 1 OS=Homo sapiens OX=9606 GN=UBA1 PE=1 SV=3	5	2	2	1058	117.8	5.76
P43243	Matrin-3 OS=Homo sapiens OX=9606 GN=MATR3 PE=1 SV=2	3	1	1	847	94.6	6.25
P50991	T-complex protein 1 subunit delta OS=Homo sapiens OX=9606 GN=CCT4 PE=1 SV=4	5	1	1	539	57.9	7.83
O75015	Low affinity immunoglobulin gamma Fc region receptor III-B OS=Homo sapiens OX=9606 GN=FCGR3B PE=1 SV=2	15	3	1	233	26.2	6.71
P04406	Glyceraldehyde-3-phosphate dehydrogenase OS=Homo sapiens OX=9606 GN=GAPDH PE=1 SV=3	4	1	1	335	36	8.46					272081
P26038	Moesin OS=Homo sapiens OX=9606 GN=MSN PE=1 SV=3	5	1	1	577	67.8	6.4
Q5D862	Filaggrin-2 OS=Homo sapiens OX=9606 GN=FLG2 PE=1 SV=1	0	1	1	2391	247.9	8.31					60878.2
P46940	Ras GTPase-activating-like protein IQGAP1 OS=Homo sapiens OX=9606 GN=IQGAP1 PE=1 SV=1	2	1	1	1657	189.1	6.48
P31949	Protein S100-A11 OS=Homo sapiens OX=9606 GN=S100A11 PE=1 SV=2	10	1	1	105	11.7	7.12					205242
P06576	ATP synthase subunit beta, mitochondrial OS=Homo sapiens OX=9606 GN=ATP5F1B PE=1 SV=3	6	1	1	529	56.5	5.4
Q96QV6	Histone H2A type 1-A OS=Homo sapiens OX=9606 GN=H2AC1 PE=1 SV=3	18	1	1	131	14.2	10.86
P27635	60S ribosomal protein L10 OS=Homo sapiens OX=9606 GN=RPL10 PE=1 SV=4	13	1	1	214	24.6	10.08
P22626	Heterogeneous nuclear ribonucleoproteins A2/B1 OS=Homo sapiens OX=9606 GN=HNRNPA2B1 PE=1 SV=2	5	1	1	353	37.4	8.95
P35754	Glutaredoxin-1 OS=Homo sapiens OX=9606 GN=GLRX PE=1 SV=2	23	2	2	106	11.8	8.09					159387
P02647	Apolipoprotein A-I OS=Homo sapiens OX=9606 GN=APOA1 PE=1 SV=1	4	1	1	267	30.8	5.76					77855.4
Q9HD89	Resistin OS=Homo sapiens OX=9606 GN=RETN PE=1 SV=1	10	1	1	108	11.4	6.86					251885
Q96G03	Phosphoglucomutase-2 OS=Homo sapiens OX=9606 GN=PGM2 PE=1 SV=4	1	1	1	612	68.2	6.73		94387.6
P04217	Alpha-1B-glycoprotein OS=Homo sapiens OX=9606 GN=A1BG PE=1 SV=4	2	1	1	495	54.2	5.86		38117
P60660	Myosin light polypeptide 6 OS=Homo sapiens OX=9606 GN=MYL6 PE=1 SV=2	9	1	1	151	16.9	4.65
P35579	Myosin-9 OS=Homo sapiens OX=9606 GN=MYH9 PE=1 SV=4	1	1	1	1960	226.4	5.6
Q96QU8	Exportin-6 OS=Homo sapiens OX=9606 GN=XPO6 PE=1 SV=1	2	1	1	1125	128.8	6.35
Q86UX7	Fermitin family homolog 3 OS=Homo sapiens OX=9606 GN=FERMT3 PE=1 SV=1	1	1	1	667	75.9	6.98		6881.05			114517
Q01105	Protein SET OS=Homo sapiens OX=9606 GN=SET PE=1 SV=3	10	1	1	290	33.5	4.32			1.02428e+06
P61978	Heterogeneous nuclear ribonucleoprotein K OS=Homo sapiens OX=9606 GN=HNRNPK PE=1 SV=1	8	1	1	463	50.9	5.54			604578
P00390	Glutathione reductase, mitochondrial OS=Homo sapiens OX=9606 GN=GSR PE=1 SV=2	5	2	2	522	56.2	8.5			433945
P01011	Alpha-1-antichymotrypsin OS=Homo sapiens OX=9606 GN=SERPINA3 PE=1 SV=2	4	2	2	423	47.6	5.52		31865.4	313489
P62081	40S ribosomal protein S7 OS=Homo sapiens OX=9606 GN=RPS7 PE=1 SV=1	15	1	1	194	22.1	10.1			243096
P24534	Elongation factor 1-beta OS=Homo sapiens OX=9606 GN=EEF1B2 PE=1 SV=3	14	1	1	225	24.7	4.67			207976
P08637	Low affinity immunoglobulin gamma Fc region receptor III-A OS=Homo sapiens OX=9606 GN=FCGR3A PE=1 SV=2	12	3	1	254	29.1	8.07		63852.7	189178
P01876	Immunoglobulin heavy constant alpha 1 OS=Homo sapiens OX=9606 GN=IGHA1 PE=1 SV=2	4	1	1	353	37.6	6.51			155983
P18206	Vinculin OS=Homo sapiens OX=9606 GN=VCL PE=1 SV=4	2	1	1	1134	123.7	5.66			66120.1
P00367	Glutamate dehydrogenase 1, mitochondrial OS=Homo sapiens OX=9606 GN=GLUD1 PE=1 SV=2	2	1	1	558	61.4	7.8			63679.1
P02042	Hemoglobin subunit delta OS=Homo sapiens OX=9606 GN=HBD PE=1 SV=2	47	7	2	147	16	8.05				4.34752e+06
O75368	SH3 domain-binding glutamic acid-rich-like protein OS=Homo sapiens OX=9606 GN=SH3BGRL PE=1 SV=1	11	1	1	114	12.8	5.25				368058
P49913	Cathelicidin antimicrobial peptide OS=Homo sapiens OX=9606 GN=CAMP PE=1 SV=1	6	1	1	170	19.3	9.41				151363
P08567	Pleckstrin OS=Homo sapiens OX=9606 GN=PLEK PE=1 SV=3	4	1	1	350	40.1	8.28				127048
P07237	Protein disulfide-isomerase OS=Homo sapiens OX=9606 GN=P4HB PE=1 SV=3	6	1	1	508	57.1	4.87				106104	31668.3
P12814	Alpha-actinin-1 OS=Homo sapiens OX=9606 GN=ACTN1 PE=1 SV=2	7	4	4	892	103	5.41		226640	176434	85655.7
P06744	Glucose-6-phosphate isomerase OS=Homo sapiens OX=9606 GN=GPI PE=1 SV=4	15	6	6	558	63.1	8.32		92482.3	2.09869e+07	9179.42	5798.48
P02788	Lactotransferrin OS=Homo sapiens OX=9606 GN=LTF PE=1 SV=6	47	29	29	710	78.1	8.12	1.74341e+08	2.8002e+06	835537	53510.1	15074.3
P04264	Keratin, type II cytoskeletal 1 OS=Homo sapiens OX=9606 GN=KRT1 PE=1 SV=6	29	21	19	644	66	8.12	4.76749e+07	6.48025e+07	1.9458e+07	4.86748e+07	2.54851e+07
P13645	Keratin, type I cytoskeletal 10 OS=Homo sapiens OX=9606 GN=KRT10 PE=1 SV=6	43	18	16	584	58.8	5.21	2.76848e+07	8.07221e+07	1.55577e+07	1.79115e+07	9.26898e+06
P35527	Keratin, type I cytoskeletal 9 OS=Homo sapiens OX=9606 GN=KRT9 PE=1 SV=3	38	14	14	623	62	5.24	1.86667e+07	1.40543e+07	6.48297e+06	2.37889e+07	1.27687e+07
P14780	Matrix metalloproteinase-9 OS=Homo sapiens OX=9606 GN=MMP9 PE=1 SV=3	13	6	6	707	78.4	6.06	1.03785e+07	342931	149804	12933.1	7393.64
P35908	Keratin, type II cytoskeletal 2 epidermal OS=Homo sapiens OX=9606 GN=KRT2 PE=1 SV=2	47	19	15	639	65.4	8	8.51389e+06	3.17124e+07	3.95859e+06	6.98141e+06	4.95866e+06
P48739	Phosphatidylinositol transfer protein beta isoform OS=Homo sapiens OX=9606 GN=PITPNB PE=1 SV=2	7	1	1	271	31.5	6.87	5104034	2.834e+06	1.40052e+06	910285	468877
Q8WVJ2	NudC domain-containing protein 2 OS=Homo sapiens OX=9606 GN=NUDCD2 PE=1 SV=1	13	1	1	157	17.7	5.07	4.5461e+06	6.52429e+06	4.23828e+06	4.75197e+06	3333037
P13647	Keratin, type II cytoskeletal 5 OS=Homo sapiens OX=9606 GN=KRT5 PE=1 SV=3	20	10	6	590	62.3	7.74	3.06813e+06	3.5493e+06	1.27199e+06	2.23988e+06	1.01767e+06
P62805	Histone H4 OS=Homo sapiens OX=9606 GN=H4C1 PE=1 SV=2	41	4	4	103	11.4	11.36	2.22517e+06	2.19669e+06	2.36978e+06	2.20766e+06	3.20259e+06
P02768	Albumin OS=Homo sapiens OX=9606 GN=ALB PE=1 SV=2	61	30	30	609	69.3	6.28	1.56233e+06	1.39583e+08	3.44968e+06	994164	1.1049e+06
P02787	Serotransferrin OS=Homo sapiens OX=9606 GN=TF PE=1 SV=3	8	5	5	698	77	7.12	1.42991e+06	40718.6	13074.3
P02533	Keratin, type I cytoskeletal 14 OS=Homo sapiens OX=9606 GN=KRT14 PE=1 SV=4	26	12	4	472	51.5	5.16	1.14344e+06	1.18515e+06	435935	1.03666e+06	283576
P35030	Trypsin-3 OS=Homo sapiens OX=9606 GN=PRSS3 PE=1 SV=2	4	1	1	304	32.5	7.49	923037	1.22356e+06	1.0916e+06	979275	988021
P60709	Actin, cytoplasmic 1 OS=Homo sapiens OX=9606 GN=ACTB PE=1 SV=1	11	4	4	375	41.7	5.48	916194	976746	962649	915908	980742
P07477	Trypsin-1 OS=Homo sapiens OX=9606 GN=PRSS1 PE=1 SV=1	8	1	1	247	26.5	6.51	642832	1.04197e+06	915084	917490
P02538	Keratin, type II cytoskeletal 6A OS=Homo sapiens OX=9606 GN=KRT6A PE=1 SV=3	14	7	3	564	60	8	574482	748893	886891	651714	145072
P62937	Peptidyl-prolyl cis-trans isomerase A OS=Homo sapiens OX=9606 GN=PPIA PE=1 SV=2	5	1	1	165	18	7.81	494446	502304	565270	493322	524749
P68104	Elongation factor 1-alpha 1 OS=Homo sapiens OX=9606 GN=EEF1A1 PE=1 SV=1	7	3	3	462	50.1	9.01	418146	513030	445638	395558	425548
P05109	Protein S100-A8 OS=Homo sapiens OX=9606 GN=S100A8 PE=1 SV=1	69	8	8	93	10.8	7.03	371679	333395	274333	5.00831e+06	1.38074e+09
P69905	Hemoglobin subunit alpha OS=Homo sapiens OX=9606 GN=HBA1 PE=1 SV=2	84	8	8	142	15.2	8.68	338832	449616	440720	2.43848e+08	398524
P63104	14-3-3 protein zeta/delta OS=Homo sapiens OX=9606 GN=YWHAZ PE=1 SV=1	7	2	2	245	27.7	4.79	293630	260468	247391	303725	302532
Q7RTS7	Keratin, type II cytoskeletal 74 OS=Homo sapiens OX=9606 GN=KRT74 PE=1 SV=2	6	3	3	529	57.8	7.71	279281	272976	37108.9	45940.9	30660.3
P16402	Histone H1.3 OS=Homo sapiens OX=9606 GN=H1-3 PE=1 SV=2	9	2	2	221	22.3	11.02	247970	241697	232528	222482	236063
P06702	Protein S100-A9 OS=Homo sapiens OX=9606 GN=S100A9 PE=1 SV=1	68	5	5	114	13.2	6.13	239374	330720	360233	2.47537e+08	2.06625e+06
Q16778	Histone H2B type 2-E OS=Homo sapiens OX=9606 GN=H2BC21 PE=1 SV=3	12	1	1	126	13.9	10.32	236787	237212	234482	226696	287485
P08779	Keratin, type I cytoskeletal 16 OS=Homo sapiens OX=9606 GN=KRT16 PE=1 SV=4	23	11	3	473	51.2	5.05	233993	197904	198923	410943	8215.29
P06733	Alpha-enolase OS=Homo sapiens OX=9606 GN=ENO1 PE=1 SV=2	3	1	1	434	47.1	7.39	223823	249008	236171	233151	244094
P29401	Transketolase OS=Homo sapiens OX=9606 GN=TKT PE=1 SV=3	37	16	16	623	67.8	7.66	208620	7.14517e+07	157534	12746.7	15359.4
P68871	Hemoglobin subunit beta OS=Homo sapiens OX=9606 GN=HBB PE=1 SV=2	88	12	7	147	16	7.28	197413	315242	263008	3.00669e+08	292503
Q71U36	Tubulin alpha-1A chain OS=Homo sapiens OX=9606 GN=TUBA1A PE=1 SV=1	2	1	1	451	50.1	5.06	177246	164781	167556	154917	181182
P62987	Ubiquitin-60S ribosomal protein L40 OS=Homo sapiens OX=9606 GN=UBA52 PE=1 SV=2	13	1	1	128	14.7	9.83	169259	184299	183948	127618	143797
P15531	Nucleoside diphosphate kinase A OS=Homo sapiens OX=9606 GN=NME1 PE=1 SV=1	6	1	1	152	17.1	6.19	132351	137117	130222	134838	198385
P07737	Profilin-1 OS=Homo sapiens OX=9606 GN=PFN1 PE=1 SV=2	46	5	5	140	15	8.27	130036	167938	145495	1.95524e+07	246471
P10909	Clusterin OS=Homo sapiens OX=9606 GN=CLU PE=1 SV=1	5	2	2	449	52.5	6.27	128666	107389	173473	113497	150663
P02763	Alpha-1-acid glycoprotein 1 OS=Homo sapiens OX=9606 GN=ORM1 PE=1 SV=1	4	1	1	201	23.5	5.02	128546	242562	50443.4
P61626	Lysozyme C OS=Homo sapiens OX=9606 GN=LYZ PE=1 SV=1	41	4	4	148	16.5	9.16	113708	98655.4	76760.4	2.52564e+07	124625
P00338	L-lactate dehydrogenase A chain OS=Homo sapiens OX=9606 GN=LDHA PE=1 SV=2	14	3	3	332	36.7	8.27	100162	121140	113676	107200	114400
P00738	Haptoglobin OS=Homo sapiens OX=9606 GN=HP PE=1 SV=1	8	3	3	406	45.2	6.58	85870.4	1.48485e+06	3.11357e+06		13168.6
P04040	Catalase OS=Homo sapiens OX=9606 GN=CAT PE=1 SV=3	32	13	13	527	59.7	7.39	83069.2	871277	3.36368e+07	488289	53329.3
P60174	Triosephosphate isomerase OS=Homo sapiens OX=9606 GN=TPI1 PE=1 SV=4	12	1	1	249	26.7	6.9	76240.1		2.59408e+06	889304
P21333	Filamin-A OS=Homo sapiens OX=9606 GN=FLNA PE=1 SV=4	2	2	2	2647	280.6	6.06	73087.8	125922	184155
P27797	Calreticulin OS=Homo sapiens OX=9606 GN=CALR PE=1 SV=1	6	2	2	417	48.1	4.44	70465.9	55773.1	362833	49288.7	57527.9
P07900	Heat shock protein HSP 90-alpha OS=Homo sapiens OX=9606 GN=HSP90AA1 PE=1 SV=5	2	1	1	732	84.6	5.02	65291.3	55962.8	74668.5	57624.8	80450.2
P01024	Complement C3 OS=Homo sapiens OX=9606 GN=C3 PE=1 SV=2	3	4	4	1663	187	6.4	59310.6	439106	65858.7	54434.5	56117
Q13162	Peroxiredoxin-4 OS=Homo sapiens OX=9606 GN=PRDX4 PE=1 SV=1	3	1	1	271	30.5	6.29	55526.2	42700.9	50046.8	39818.3	58899.2
P54652	Heat shock-related 70 kDa protein 2 OS=Homo sapiens OX=9606 GN=HSPA2 PE=1 SV=1	2	1	1	639	70	5.74	53578.8	48838.3	45008	49680.7	45427.2
P13796	Plastin-2 OS=Homo sapiens OX=9606 GN=LCP1 PE=1 SV=6	48	22	22	627	70.2	5.43	51935.9	674275	4.4587e+07	11006.7	11879.2
P02545	Prelamin-A/C OS=Homo sapiens OX=9606 GN=LMNA PE=1 SV=1	1	1	1	664	74.1	7.02	51383.6	57836	53754.4	54505.7	49880.6
Q7L1Q6	Basic leucine zipper and W2 domain-containing protein 1 OS=Homo sapiens OX=9606 GN=BZW1 PE=1 SV=1	6	1	1	419	48	5.92	46163.4			124747	26847.6
Q5T749	Keratinocyte proline-rich protein OS=Homo sapiens OX=9606 GN=KPRP PE=1 SV=1	2	1	1	579	64.1	8.27	45308.2	94479.5		67017.1	33449.8
P01009	Alpha-1-antitrypsin OS=Homo sapiens OX=9606 GN=SERPINA1 PE=1 SV=3	2	1	1	418	46.7	5.59	42377	122470	470550	15506.2	16878.3
P10809	60 kDa heat shock protein, mitochondrial OS=Homo sapiens OX=9606 GN=HSPD1 PE=1 SV=2	4	1	1	573	61	5.87	36291.5	27940.8	66527.9	127466	39328.7
P50454	Serpin H1 OS=Homo sapiens OX=9606 GN=SERPINH1 PE=1 SV=2	6	1	1	418	46.4	8.69	34865.5		289438	298498	57456.5
P02679	Fibrinogen gamma chain OS=Homo sapiens OX=9606 GN=FGG PE=1 SV=3	11	3	3	453	51.5	5.62	32198.1	825910	41343.5
Q02413	Desmoglein-1 OS=Homo sapiens OX=9606 GN=DSG1 PE=1 SV=2	1	1	1	1049	113.7	5.03	32168.7	110465		48050.6	8841.64
P0DMV9	Heat shock 70 kDa protein 1B OS=Homo sapiens OX=9606 GN=HSPA1B PE=1 SV=1	6	2	2	641	70	5.66	28537.8	81941.3	48291.3	30684.4	34736.1
P22894	Neutrophil collagenase OS=Homo sapiens OX=9606 GN=MMP8 PE=1 SV=1	9	3	3	467	53.4	6.87	26266.7	638523	39824.3
P62314	Small nuclear ribonucleoprotein Sm D1 OS=Homo sapiens OX=9606 GN=SNRPD1 PE=1 SV=1	9	1	1	119	13.3	11.56	17319.5	22532.2	22732	21531.1	187171
P05164	Myeloperoxidase OS=Homo sapiens OX=9606 GN=MPO PE=1 SV=1	14	8	8	745	83.8	8.97	13906.7	501795	5.92703e+06

## Sheet: Suppl. Table legends
Supplemental Table S1: Quantitative MS raw data of the NGC in-solution digestion. For each protein, the Uniprot accession number, the protein Description, the sequence Coverage in %, the number of identified Peptides, the number of Unique Peptides, the number of Amino Acids (AA), the Molecular weight (kDa) and non-normalized the label-free quantification for each replicate are indicated. The data…
Supplemental Table S2: Quantitative MS raw data of the SDS-PAGE fractionated NGC in-gel digestion. For each protein, the Uniprot accession number, the protein Description, the sequence Coverage in %, the number of identified Peptides, the number of Unique Peptides, the number of Amino Acids (AA), the Molecular weight (kDa) and non-normalized the label-free quantification for each replicate are in…
